# Supplementary material for: Identification of Recurrent Variants in BRCA1 and BRCA2 across Multiple Cancers in the Chinese Population
Source: Hindawi journal article supplement (doi:10.1155/2020/6739823), 2020-01-01
Supplement: f1 [file 6739823.f1.pdf]

**Supplementary table 1. Information of primers for *BRCA1***

| <b>Exons of <i>BRCA1</i></b> | <b>Primers</b>                                                                                                                                                                                                                                                                         |
|------------------------------|----------------------------------------------------------------------------------------------------------------------------------------------------------------------------------------------------------------------------------------------------------------------------------------|
| ENSE00001871077              | F:AAGGGGTTGGCAGCAATATG<br>R:AGGCAGAGTGGATGGAGAAC                                                                                                                                                                                                                                       |
| ENSE00003559512              | F:TTGAACGAACTTGAGGCCTT<br>R:TATGTCAGTCGGGTGTGGTG                                                                                                                                                                                                                                       |
| ENSE00003510592              | F:GGCTCTTAAGGGCAGTTGTG<br>R:GCGATACAGCCCTACTTTACA                                                                                                                                                                                                                                      |
| ENSE00003541068              | F:CACTGCCATCACACGGTTTA<br>R:GCTAAGACACCAACAATGTAAGT                                                                                                                                                                                                                                    |
| ENSE00003531836              | F:TGTTGGTGTCTTAGCTTTAGTGA<br>R:CAATTTGGGGAGCCGAGGT                                                                                                                                                                                                                                     |
| ENSE00003513709              | F:TCCCAGCCCCAGACATTTTA<br>R:CCAAAGCTGCCTACCACAAA                                                                                                                                                                                                                                       |
| ENSE00003642045              | F:TGCCACAGTAGATGCTCAGT<br>R:GCACATACATCCCTGAACCT                                                                                                                                                                                                                                       |
| ENSE00003587679              | F:GCCCAGCAACCATTTCATTTC<br>R:GGTTGTAAAGGTCCCAAATGG<br>1F:TGGTTGATTTCACCTCCAAG<br>1R:ACACAGGGGATCAGCATTCA<br>2F:ACTCATGCCAGCTCATTACAG<br>2R:CATGGCTTAAGTTGGGGAGG<br>3F:GCCATGCTCAGAGAATCCTAG<br>3R:ACTGCTGCTTATAGG TTCAGC<br>4F:TGGCAGTTCAAAAGACTCCTG<br>4R:CTTCTTGGCTCCAGTTGCAG        |
| ENSE00003522602              | 5F:ACGAAAGCTGAACCTATAAGCAG<br>5R:AGTGCCATAATCAGTACCAGGT<br>6F:GCCAAGAAGAGTAACAAGCCA<br>6R:TGTTTCTTTAAGGACCCAGAGTG<br>7F:CACAGTCGGGAAACAAGCAT<br>7R:CGGCTAATTGTGCTCACTGT<br>8F:GGCAACGAACTGGACTCAT<br>8R:TGTGTATGGGTGAAAGGGCT<br>9F:TGGGAAGTAGTCATGCATCTCA<br>9R:TGTAAAATGTGCTCCCCAAAAG |
| ENSE00003547126              | F:AAAGCAAATCCAGGTGTCCC<br>R:GCAGTGTATGTGTAGGCTGTG                                                                                                                                                                                                                                      |
| ENSE00003527960              | F:AGGTGATTTCAATTCCTGTGCT<br>R:ACATGAATGACTGCCTTGGG                                                                                                                                                                                                                                     |
| ENSE00003791246              | F:GTCTGTTGCATTGCTTGTGT<br>R:AAGGGCTGCCTTGAAGAAGT                                                                                                                                                                                                                                       |
| ENSE00003537850              | F:GACTTCTAGGCTGTCTTGCG                                                                                                                                                                                                                                                                 |

|                 |                            |
|-----------------|----------------------------|
|                 | R:ACACCAAGACTCCCTCATCC     |
|                 | 1F:ACCAACACTGTATTCATGTACCC |
| ENSE00003497952 | 1R:AATTCTGGCTTCTCCCTGCT    |
|                 | 2F:GCCTCTTCTCTGATGACCCT    |
|                 | 2R:TGGCAGTACATTTGGAACCAG   |
| ENSE00003492626 | F:TTTAAATAGTTCCAGGACAC     |
|                 | R:CTCCCAAAGTGCTGCGATTA     |
| ENSE00003591784 | F:GCCTCCCCTAGACTTCCAAAT    |
|                 | R:GGTAACTCAGACTCAGCATCAG   |
| ENSE00003672792 | F:CCTCTGTCATTCTTCCTGTGC    |
|                 | R:GTGGTGCATTGATGGAAGGA     |
| ENSE00003458468 | F:GCCTTAAATATGACGTGTCTGCT  |
|                 | R:AAAATGAAGCGGCCCATCTC     |
| ENSE00003477922 | F:CTGGACATTGGACTGCTTGT     |
|                 | R:GCTGTTTTGTTTGGAGAGTGG    |
| ENSE00003628864 | F:TCCTTTGGAGCAGAGAGACAG    |
|                 | R:GCAGTTCTCAAATCCTTACCCA   |
| ENSE00003687053 | F:GGTGGTGGTACGTGTCTGTA     |
|                 | R:AAATGTGCCAAGAACTGTGC     |
| ENSE00001814242 | F:ACTCATACAACCAGGACCCT     |
|                 | R:ACCCTTGCATAGCCAGAAGT     |

---

**Supplementary table 2. Information of primers for *BRCA2***

| <b>Exons of <i>BRCA2</i></b> | <b>Primers</b>                                                                                                                                                                                                                                                                                                                                                                                |
|------------------------------|-----------------------------------------------------------------------------------------------------------------------------------------------------------------------------------------------------------------------------------------------------------------------------------------------------------------------------------------------------------------------------------------------|
| ENSE00001484009              | F:AGCGCTTCTGAGTTTTACCTC<br>R:AGCAACACTGTGACGTACTG                                                                                                                                                                                                                                                                                                                                             |
| ENSE00003666217              | F:GGGGTTTCAACGTGTTAGCA<br>R:GCCCAGCATGACACAATTAATG                                                                                                                                                                                                                                                                                                                                            |
| ENSE00003659301              | F:CCCTATACATTCTCATTCCCAGT<br>R:TGTAAGATCTTCTACCAGGCTCT                                                                                                                                                                                                                                                                                                                                        |
| ENSE00003739878              | F:AATACACGGTTTCCAGCAGC                                                                                                                                                                                                                                                                                                                                                                        |
| ENSE00003747332              | R:GATCCACCTCAGCTCCTAGAC                                                                                                                                                                                                                                                                                                                                                                       |
| ENSE00003749714              | F:GCGTTATACCTTTGCCCTGA<br>R:ATGCTTGACACCACTGGACT                                                                                                                                                                                                                                                                                                                                              |
| ENSE00003714754              | F:ACCAAGCCATATCTTACCACCT<br>R:ACAGAGAGACAGCAGAGTTTCA                                                                                                                                                                                                                                                                                                                                          |
| ENSE00003731761              | F:TGGACCTAGGTTGATTGCAG<br>R:TGAGGCAGGATCGCTTGA<br>1F:AACAGGAGAAGGGGTGACTG<br>1R:GGTAGGCTAGAAATACGTGGC                                                                                                                                                                                                                                                                                         |
| ENSE00000939167              | 2F:GGCCTGTGAATGGTCTCAAC<br>2R:GCTTCAAACCTGGGCTGAACA<br>3F:TGCTCACAGAAGGAGGACTC<br>3R:ACCATGTTTGAGTGACCTGAT<br>1F:CCTGAGTAACTGGCACCACA<br>1R:TGTTGTACTGGGTGACATGC<br>2F:TCTGAAGAACCAACTTTGTCCT<br>2R:GGCAACAGCTCAACGTTTT<br>3F:CAGCACTCTTATTTTAACTC<br>3R:CATTTTGCTCTTCTTAATGT<br>4F:ACAAGCAACCCAAGTGTCAA<br>4R:TCAACAGGCCAGCAAACCTC<br>5F:ACCCCTCAGATGTTATTTTCCA<br>5R:TGAGAATTTCTACTGGCAGCAG |
| ENSE00000939168              | 6F:AAGTGGGGTTTAGGGGCTTT<br>6R:TCCCACCTTGCACTCTGAAAA<br>7F:GGCCAGTTTATGAAGGAGGG<br>7R:TGGCACCACAGTCTCAATAGA<br>8F:GGTTTTTCATACAGCTAGCGGG<br>8R:GCTGTTAGACATGCTACTGTTAC<br>9F:TCAGTCCCCTTATTCAGTCATTG<br>9R:CTGAATCATCCAATGCCTCGT<br>10F:TGTGACTAGCTCTTACCCTG<br>10R:TGTTCTGGAGTACGTATAGCAGT<br>11F:CAGCAAGTGGAATCTGTCCA<br>11R:AGCCTGTTCTTTTCCCAAAC                                            |

|                 |                              |
|-----------------|------------------------------|
|                 | 12F: TGATAAGAGAAACCCAGAGCACT |
|                 | 12R: TCCTCATTTTCGGGACATGTAA  |
|                 | 13F: TGGGAAAAGAACAGGCTTCAC   |
|                 | 13R: GCCTCCCGGAAACCAACT      |
| ENSE00000939169 | F: GCTTATCTGTGGTATCTGGTAGC   |
|                 | R: ACTTTGAGAGGCAGGTGGAT      |
| ENSE00000939171 | F: TGAGCATCTGTTACATTCACTGA   |
|                 | R: TTAAGTGAATTCGGAGCAATTTCC  |
| ENSE00000939173 | F: GCAAATGAGGGTCTGCAACA      |
|                 | R: AGGGCTTTAAAATTACCACCACC   |
| ENSE00000939174 | F: CCACACCTGGCTACTTTTGT      |
|                 | R: GCACAGATCACTTTAGCAGGA     |
| ENSE00000939175 | F: GGGGTGGAAAAGGTACAGCA      |
|                 | R: TAAACCCCAGGACAAACAGC      |
| ENSE00001394102 | F: GGGGTCTCACTATGTTGCCT      |
|                 | R: AGGGATGACAGGAGAACAGC      |
|                 | 1F: CTTGCTTCCCTCTTTCCCA      |
|                 | 1R: ACCAACTGTCAGTCTGCCAT     |
| ENSE00000939177 | 2F: GGGATGACACAGCTGCAAAA     |
|                 | 2R: GAGAACAAGAGGGCAGCAAG     |
| ENSE00000939178 | F: TCTCTCTAGTTGCCTTTGTCCA    |
|                 | R: TGGCTCAGCTACTTGAGAGG      |
| ENSE00000939180 | F: TCCACTAATCTCAGCCTCCC      |
|                 | R: AGGTCCTAGTTCCAGGCATA      |
| ENSE00003461148 | F: CTTTAAATCTCCCTTCTTTG      |
|                 | R: CTGGCACATCACTGAAAATC      |
| ENSE00000939183 | F: ACCACACCCTTAAGATGAGCT     |
|                 | R: CTTTGTGGGCATTAGTAGTGGA    |
| ENSE00000939185 | F: CCACTACTAATGCCCACAAAGA    |
|                 | R: CCACCTCAGAACAAGATGGC      |
| ENSE00000939187 | F: CACTTCTTCCATTGCATCTTTCT   |
|                 | R: AGGATGTAACTTGTTACCCTTGA   |
| ENSE00000939189 | F: TGGAAAACCTGAGCTTTTCGC     |
|                 | R: TCCTGAGGTTTCATGGGCAAT     |
| ENSE00003560258 | F: TCTCTGTTCCCTCTCCCTAT      |
|                 | R: ACAGGAGCCACATAACAACC      |
|                 | 1F: GGGAGGGAGACTGTGTGTAA     |
|                 | 1R: CTGAACTGGTGGGAGCAGT      |
| ENSE00001184789 | 2F: GAGTTGTGGCACCAAATACGA    |
|                 | 2R: CCGATACACAAACGCTGAGG     |

---

**Supplementary Table 3. Distributions of selected variables in multi-cancer cases and cancer-free controls**

| Variables                                                          | Discovery Stage | Validation Stage |                    | <i>P</i> value |
|--------------------------------------------------------------------|-----------------|------------------|--------------------|----------------|
|                                                                    | Breast Cancer   | Breast Cancer    |                    |                |
|                                                                    | Case (N = 70)   | Case (N = 3217)  | Control (N = 2660) |                |
| <b>Gender</b>                                                      |                 |                  |                    |                |
| Male                                                               | 0(0%)           | 0(0%)            | 0(0%)              |                |
| Female                                                             | 70(100%)        | 3217(100%)       | 2660(100%)         |                |
| <b>Age, years (mean ±s.d.)<sup>a</sup></b>                         | 50.04±9.45      | 50.19±11.12      | 50.42±11.87        | 0.454          |
| <b>Age at menarche, years (mean ±s.d.)<sup>b</sup></b>             | 14.57±1.55      | 14.74±1.86       | 15.86±2.08         | <0.001         |
| <b>Age at natural menopause, years (mean ±s.d.)<sup>d</sup></b>    | 49.05±4.75      | 49.05±4.41       | 48.94±4.37         | 0.543          |
| <b>Age at first live birth, years (mean ±s.d.)<sup>c</sup></b>     | 26.58±3.29      | 25.58±3.28       | 24.38±3.30         | <0.001         |
| <b>Menopausal status<sup>e</sup></b>                               |                 |                  |                    | <0.001         |
| Premenopausal                                                      | 30(42.86%)      | 1589(49.39%)     | 1359(51.10%)       |                |
| Natural menopausal                                                 | 34(48.57%)      | 1341(41.68%)     | 1260(47.37%)       |                |
| Unnatural menopausal                                               | 6(8.57%)        | 150(4.66%)       | 18(0.7%)           |                |
| <b>Estrogen receptor (ER)<sup>f</sup></b>                          |                 |                  |                    |                |
| Positive                                                           | 23(32.86%)      | 1718(53.40%)     |                    |                |
| Negative                                                           | 30(42.86%)      | 1134(35.25%)     |                    |                |
| <b>Progesterone receptor (PR)<sup>f</sup></b>                      |                 |                  |                    |                |
| Positive                                                           | 23(32.86%)      | 1594(49.55%)     |                    |                |
| Negative                                                           | 27(38.57%)      | 1247(38.76%)     |                    |                |
| <b>Human epidermal growth factor receptor-2 (HER2)<sup>f</sup></b> |                 |                  |                    |                |
| Positive                                                           | 9(12.86%)       | 280(8.70%)       |                    |                |
| Negative                                                           | 34(48.57%)      | 1109(34.47%)     |                    |                |

(Continued) Supplementary Table 3. Distributions of selected variables in multi-cancer cases and cancer-free controls

| Variables                                                 | Validation Stage |                  |         |                          |                                |         |                             |                                |         |
|-----------------------------------------------------------|------------------|------------------|---------|--------------------------|--------------------------------|---------|-----------------------------|--------------------------------|---------|
|                                                           | Cervical Cancer  |                  | P value | Hepatocellular Carcinoma |                                | P value | Colorectal Cancer           |                                | P value |
|                                                           | Case(N=1133)     | Controls(N=1098) |         | Case(N=2044)             | Controls <sup>g</sup> (n=1116) |         | Cases <sup>h</sup> (N=1116) | Controls <sup>g</sup> (N=1116) |         |
| Gender <sup>a</sup>                                       |                  |                  |         |                          |                                |         |                             |                                |         |
| Male                                                      | 0(0%)            | 0(0%)            |         | 1731(84.69%)             | 918(82.26%)                    |         | 662(59.32%)                 | 918(82.26%)                    |         |
| Female                                                    | 1133(100%)       | 1098(100%)       |         | 313(15.31%)              | 198(17.74%)                    |         | 433(38.80%)                 | 198(17.74%)                    |         |
| Age, years (mean ±s.d.) <sup>a</sup>                      | 53.80±12.59      | 52.70±11.88      | 0.053   | 52.48 ±10.57             | 52.91 ±11.33                   | 0.295   | 60.37 ±12.33                | 52.91 ±11.33                   | <0.001  |
| Age at menarche, years (mean ±s.d.) <sup>b</sup>          | 15.51±1.95       | 16.09±1.93       | <0.001  |                          |                                |         |                             |                                |         |
| Age at natural menopause, years (mean ±s.d.) <sup>c</sup> | 48.47 ±4.76      | 49.11 ±4.26      | 0.010   |                          |                                |         |                             |                                |         |
| Age at first live birth, years (mean ±s.d.) <sup>d</sup>  |                  |                  |         |                          |                                |         |                             |                                |         |
| Menopausal status                                         |                  |                  |         |                          |                                |         |                             |                                |         |
| Premenopausal                                             |                  |                  |         |                          |                                |         |                             |                                |         |
| Natural menopausal                                        |                  |                  |         |                          |                                |         |                             |                                |         |
| Unnatural menopausal                                      |                  |                  |         |                          |                                |         |                             |                                |         |
| Estrogen receptor (ER)                                    |                  |                  |         |                          |                                |         |                             |                                |         |
| Positive                                                  |                  |                  |         |                          |                                |         |                             |                                |         |
| Negative                                                  |                  |                  |         |                          |                                |         |                             |                                |         |
| Progesterone receptor (PR)                                |                  |                  |         |                          |                                |         |                             |                                |         |
| Positive                                                  |                  |                  |         |                          |                                |         |                             |                                |         |
| Negative                                                  |                  |                  |         |                          |                                |         |                             |                                |         |

<sup>a</sup> Age information was available in 70 breast cancer cases in Discover stage, 3215 breast cancer cases and 2660 controls in Validation stage.  
<sup>b</sup> Age at menarche information was available in 67 breast cancer cases in Discover stage, 3040 breast cancer cases and 2649 controls in Validation stage.  
<sup>c</sup> Age at natural menopause age information was available in 40 breast cancer cases in Discover stage, 983 breast cancer cases and 1129 controls in Validation stage.  
<sup>d</sup> Age at first live birth information was available in 64 breast cancer cases in Discover stage ,1812 breast cancer cases and 2236 controls in Validation stage.  
<sup>e</sup> Menopause information was available in 70 breast cancer cases in Discover stage, 3080 breast cancer cases and 2637 controls in Validation stage.  
<sup>f</sup> ER, PR and HER2 status information were available in 53, 50, and 43 breast cancer cases in Discover stage, 2852, 2841 and 1389 breast cancer cases in Validation stage, respectively.  
<sup>g</sup> Hepatocellular carcinoma and colorectal cancer shared the cancer-free control samples.  
<sup>h</sup> Gender information was available in 1095 colorectal cancers.

**Supplementary Table 4. 48 variants obtained from *BRCA1/2* scanning in 70 familial breast cancer cases**

| Gene         | Location(hg19)          | Variant type | Nucleotide change | MAF (1000 Genomes Project) | Classification of ENIGMA <sup>a</sup> |
|--------------|-------------------------|--------------|-------------------|----------------------------|---------------------------------------|
| <i>BRCA1</i> | chr17:41209081-41209081 | synonymous   | c.5560C>A         | NA                         | Class 3                               |
| <i>BRCA1</i> | chr17:41215910-41215910 | frameshift   | c.5133del         | NA                         | Class 3                               |
| <i>BRCA1</i> | chr17:41223094-41223094 | missense     | c.4837A>G         | 0.3558                     | Class 1                               |
| <i>BRCA1</i> | chr17:41223130-41223130 | nonsense     | c.4801A>T         | NA                         | Class 5                               |
| <i>BRCA1</i> | chr17:41228529-41228529 | missense     | c.4460A>G         | NA                         | Class 3                               |
| <i>BRCA1</i> | chr17:41234470-41234470 | synonymous   | c.4803T>C         | 0.371                      | Class 3                               |
| <i>BRCA1</i> | chr17:41244000-41244000 | missense     | c.3548A>G         | 0.371                      | Class 1                               |
| <i>BRCA1</i> | chr17:41244100-41244100 | missense     | c.3448C>T         | 0.004                      | Class 3                               |
| <i>BRCA1</i> | chr17:41244291-41244291 | nonsense     | c.3257del         | NA                         | Class 5                               |
| <i>BRCA1</i> | chr17:41244435-41244435 | missense     | c.3113A>G         | 0.371                      | Class 1                               |
| <i>BRCA1</i> | chr17:41244936-41244936 | missense     | c.2612C>A         | 0.371                      | Class 3                               |
| <i>BRCA1</i> | chr17:41244982-41244982 | missense     | c.2566T>C         | 0.014                      | Class 1                               |
| <i>BRCA1</i> | chr17:41245237-41245237 | synonymous   | c.2311T>C         | 0.3353                     | Class 1                               |
| <i>BRCA1</i> | chr17:41245466-41245466 | synonymous   | c.2082C>T         | 0.3365                     | Class 1                               |
| <i>BRCA1</i> | chr17:41245587-41245587 | frameshift   | c.1961del         | NA                         | Class 5                               |
| <i>BRCA1</i> | chr17:41245847-41245848 | frameshift   | c.1700dup         | NA                         | Class 5                               |
| <i>BRCA1</i> | chr17:41246724-41246724 | missense     | c.824G>A          | NA                         | Class 3                               |
| <i>BRCA1</i> | chr17:41246753-41246753 | synonymous   | c.795T>C          | 0.001                      | Class 1                               |
| <i>BRCA1</i> | chr17:41256140-41256140 | missense     | c.440del          | NA                         | Class 3                               |
| <i>BRCA1</i> | chr17:41258487-41258487 | synonymous   | c.198T>C          | NA                         | Class 2                               |
| <i>BRCA1</i> | chr17:41267763-41267763 | synonymous   | c.114G>A          | 0.0126                     | Class 1                               |
| <i>BRCA2</i> | chr13:32899249-32899249 | missense     | c.353G>A          | NA                         | Class 3                               |
| <i>BRCA2</i> | chr13:32906480-32906480 | missense     | c.865A>C          | 0.0737                     | Class 1                               |
| <i>BRCA2</i> | chr13:32906729-32906729 | missense     | c.1114A>C         | 0.2494                     | Class 1                               |
| <i>BRCA2</i> | chr13:32906980-32906980 | synonymous   | c.1365A>G         | 0.0737                     | Class 1                               |
| <i>BRCA2</i> | chr13:32910452-32910452 | missense     | c.1960G>A         | NA                         | Class 3                               |
| <i>BRCA2</i> | chr13:32910721-32910721 | synonymous   | c.2229T>C         | 0.095                      | Class 1                               |
| <i>BRCA2</i> | chr13:32910963-32910963 | nonsense     | c.2471T>G         | NA                         | Class 5                               |
| <i>BRCA2</i> | chr13:32911463-32911463 | missense     | c.2971A>G         | 0.097                      | Class 1                               |
| <i>BRCA2</i> | chr13:32911516-32911516 | synonymous   | c.3257C>T         | NA                         | Class 3                               |
| <i>BRCA2</i> | chr13:32911757-32911757 | nonsense     | c.3265C>T         | NA                         | Class 5                               |
| <i>BRCA2</i> | chr13:32911888-32911888 | synonymous   | c.3396A>C         | 0.368                      | Class 1                               |
| <i>BRCA2</i> | chr13:32912299-32912299 | synonymous   | c.3807T>C         | 0.173                      | Class 1                               |
| <i>BRCA2</i> | chr13:32912699-32912699 | missense     | c.4207A>G         | NA                         | Class 3                               |
| <i>BRCA2</i> | chr13:32912799-32912799 | missense     | c.4307T>C         | NA                         | Class 3                               |
| <i>BRCA2</i> | chr13:32913055-32913055 | synonymous   | c.4563A>G         | NA                         | Class 1                               |
| <i>BRCA2</i> | chr13:32913070-32913070 | synonymous   | c.4578A>C         | 0.001                      | Class 2                               |
| <i>BRCA2</i> | chr13:32914173-32914174 | nonsense     | c.5681dup         | NA                         | Class 5                               |
| <i>BRCA2</i> | chr13:32915005-32915005 | synonymous   | c.6513G>C         | NA                         | Class 1                               |
| <i>BRCA2</i> | chr13:32929083-32929083 | missense     | c.7093C>A         | NA                         | Class 3                               |
| <i>BRCA2</i> | chr13:32929140-32929140 | nonsense     | c.7149T>A         | NA                         | Class 3                               |
| <i>BRCA2</i> | chr13:32929232-32929232 | synonymous   | c.7242A>G         | 0.369                      | Class 1                               |
| <i>BRCA2</i> | chr13:32929399-32929400 | frameshift   | c.7409dup         | NA                         | Class 5                               |
| <i>BRCA2</i> | chr13:32930651-32930651 | missense     | c.7522G>A         | NA                         | Class 3                               |
| <i>BRCA2</i> | chr13:32937526-32937526 | missense     | c.8187G>T         | 0.012                      | Class 1                               |
| <i>BRCA2</i> | chr13:32930598-32930598 | missense     | c.7469T>C         | 0.003                      | Class 1                               |
| <i>BRCA2</i> | chr13:32972388-32972388 | synonymous   | c.9738C>A         | NA                         | Class 2                               |
| <i>BRCA2</i> | chr13:32972884-32972884 | missense     | c.10234A>G        | 0.021                      | Class 1                               |

<sup>a</sup> The ENIGMA classification was ascertained from BRCA exchange.

**Supplementary Table 5. No recurrent BRCA1/2 germline variants in Validation stages**

| Gene         | Nucleotide change | Validation stage |            |                 |            |                          |           |                   |           |
|--------------|-------------------|------------------|------------|-----------------|------------|--------------------------|-----------|-------------------|-----------|
|              |                   | Breast Cancer    |            | Cervical Cancer |            | Hepatocellular Carcinoma |           | Colorectal Cancer |           |
|              |                   | Cases            | Controls   | Cases           | Controls   | Cases                    | Controls* | Cases             | Controls* |
|              |                   | (N = 3217)       | (N = 2660) | (N = 1133)      | (N = 1098) | (N=2044)                 | (N=1116)  | (N = 1116)        | (N=1116)  |
| <i>BRCA1</i> | c.5133delA        | 0/3217           | 0/2660     | 0/1133          | 0/1098     | 0/2044                   | 0/1116    | 0/1116            | 0/1116    |
| <i>BRCA1</i> | c.4460A>G         | 0/3217           | 0/2660     | 0/1133          | 0/1098     | 0/2044                   | 0/1116    | 0/1116            | 0/1116    |
| <i>BRCA1</i> | c.3448C>T         | 0/3217           | 0/2660     | 0/1133          | 0/1098     | 0/2044                   | 0/1116    | 0/1116            | 0/1116    |
| <i>BRCA1</i> | c.1961del         | 0/3217           | 0/2660     | 0/1133          | 0/1098     | 0/2044                   | 0/1116    | 0/1116            | 0/1116    |
| <i>BRCA1</i> | c.1700dup         | 0/3217           | 0/2660     | 0/1133          | 0/1098     | 0/2044                   | 0/1116    | 0/1116            | 0/1116    |
| <i>BRCA1</i> | c.824G>A          | 0/3217           | 0/2660     | 0/1133          | 0/1098     | 0/2044                   | 0/1116    | 0/1116            | 0/1116    |
| <i>BRCA2</i> | c.353G>A          | 0/3217           | 0/2660     | 0/1133          | 0/1098     | 0/2044                   | 0/1116    | 0/1116            | 0/1116    |
| <i>BRCA2</i> | c.1960G>A         | 0/3217           | 0/2660     | 0/1133          | 0/1098     | 0/2044                   | 0/1116    | 0/1116            | 0/1116    |
| <i>BRCA2</i> | c.2471T>G         | 0/3217           | 0/2660     | 0/1133          | 0/1098     | 0/2044                   | 0/1116    | 0/1116            | 0/1116    |
| <i>BRCA2</i> | c.3265C>T         | 0/3217           | 0/2660     | 0/1133          | 0/1098     | 0/2044                   | 0/1116    | 0/1116            | 0/1116    |
| <i>BRCA2</i> | c.4207A>G         | 0/3217           | 0/2660     | 0/1133          | 0/1098     | 0/2044                   | 0/1116    | 0/1116            | 0/1116    |
| <i>BRCA2</i> | c.5681dup         | 0/3217           | 0/2660     | 0/1133          | 0/1098     | 0/2044                   | 0/1116    | 0/1116            | 0/1116    |
| <i>BRCA2</i> | c.7093C>A         | 0/3217           | 0/2660     | 0/1133          | 0/1098     | 0/2044                   | 0/1116    | 0/1116            | 0/1116    |
| <i>BRCA2</i> | c.7149T>A         | 0/3217           | 0/2660     | 0/1133          | 0/1098     | 0/2044                   | 0/1116    | 0/1116            | 0/1116    |
| <i>BRCA2</i> | c.7522G>A         | 0/3217           | 0/2660     | 0/1133          | 0/1098     | 0/2044                   | 0/1116    | 0/1116            | 0/1116    |



***BRCA1* c.5133delA**

**Case.26**

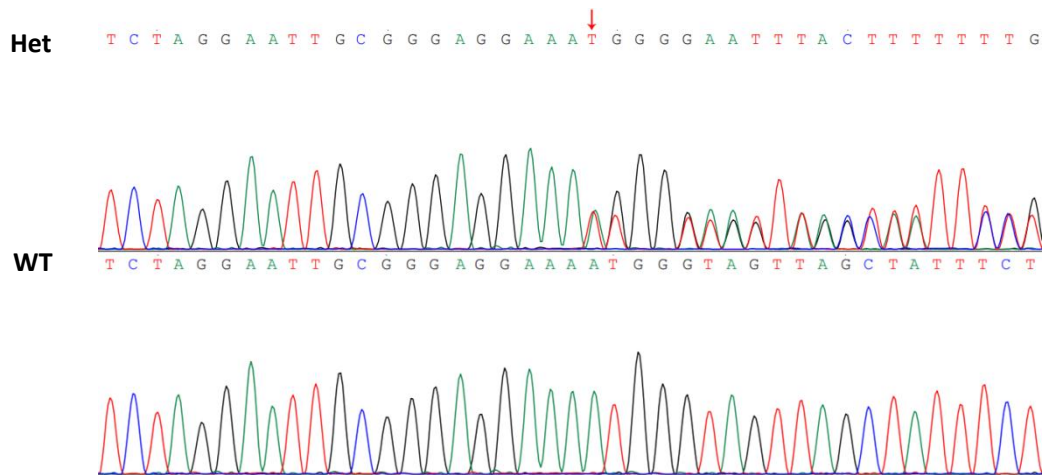

***BRCA1* c.4801A>T**

**Case.5**

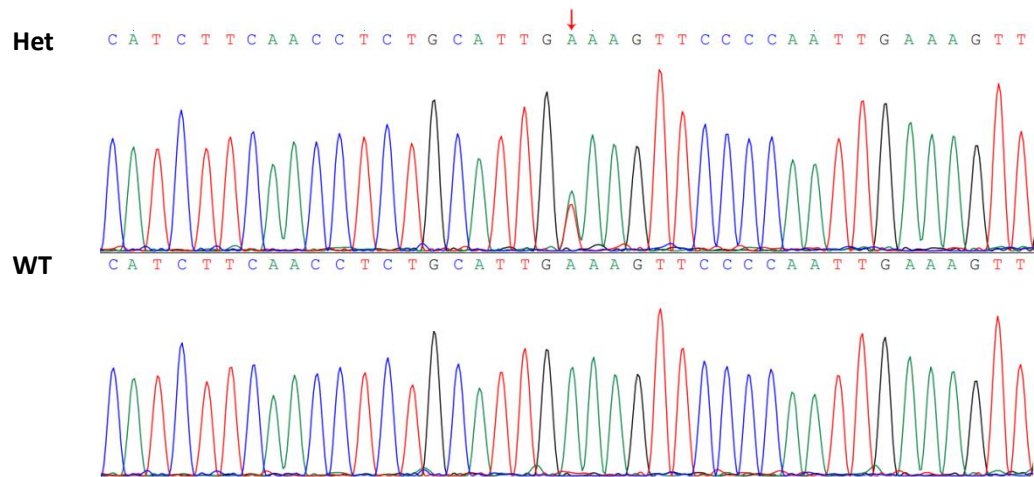

**Case.71**

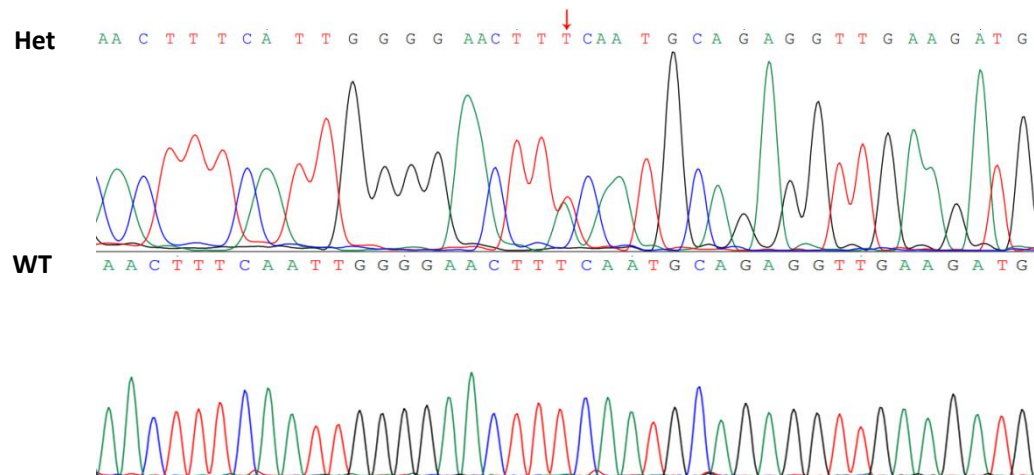

Case.78

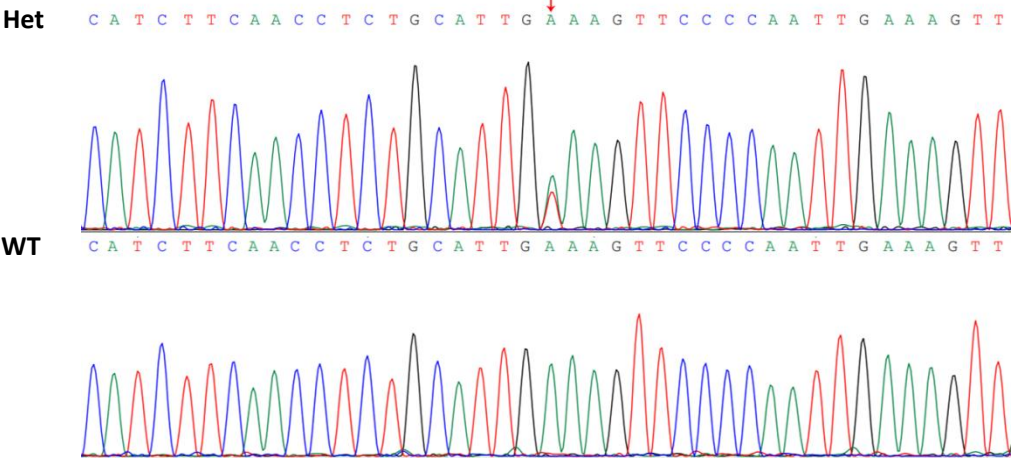

BRCA1 c.4460A>G

Case.21

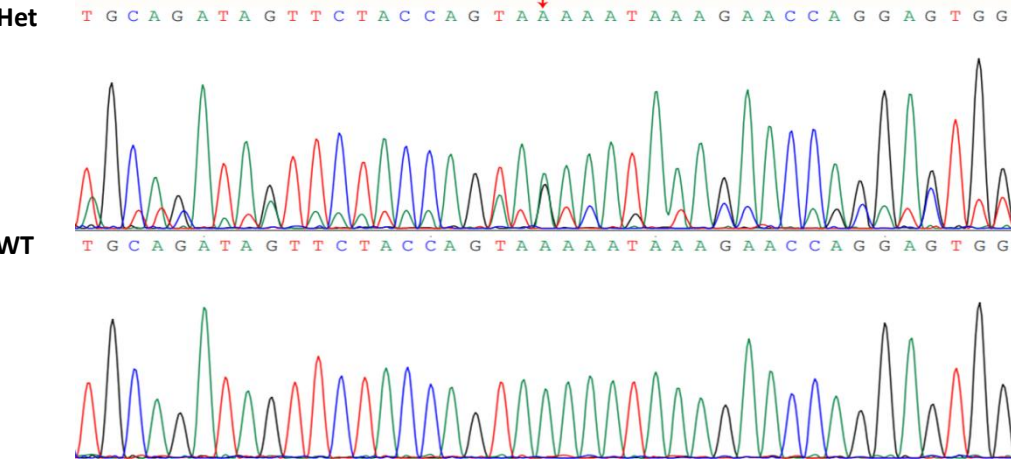

Case.23

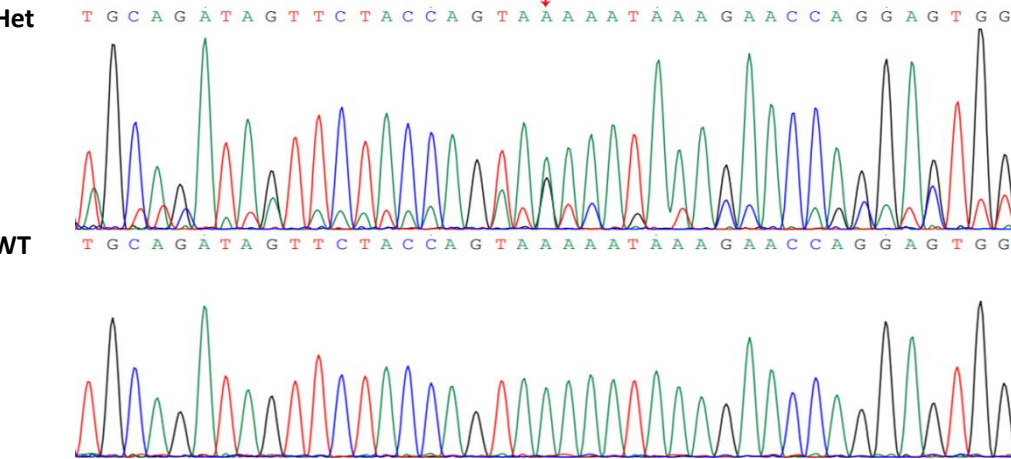

***BRCA1* c.3448C>T**

**1-14-12**

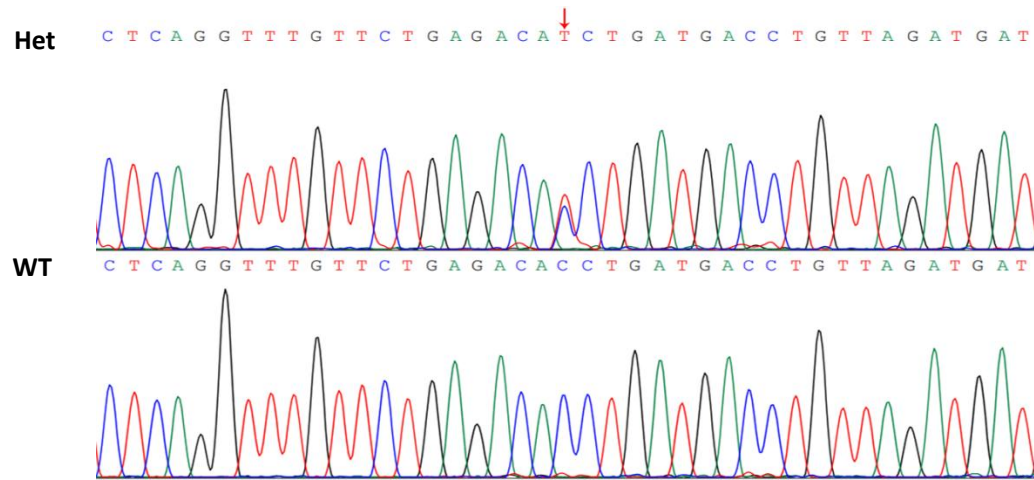

***BRCA1* c.3257delT**

**Case.62**

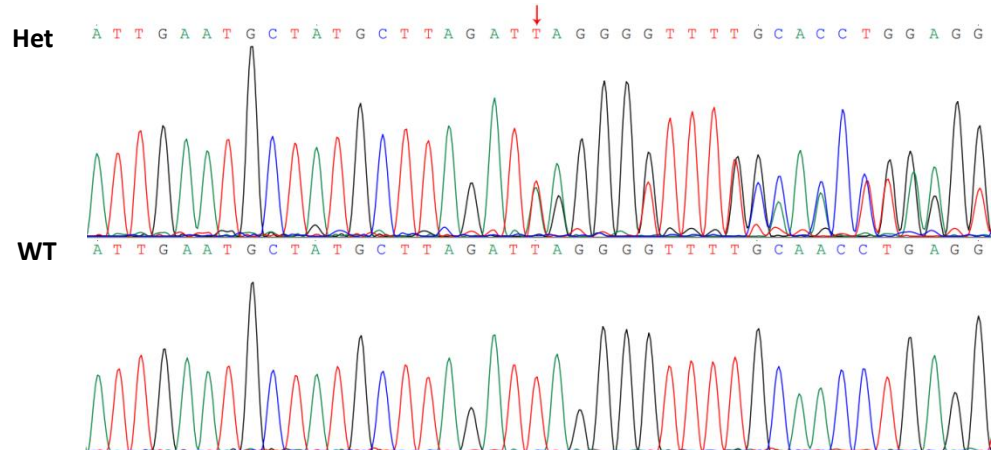

**Case.72**

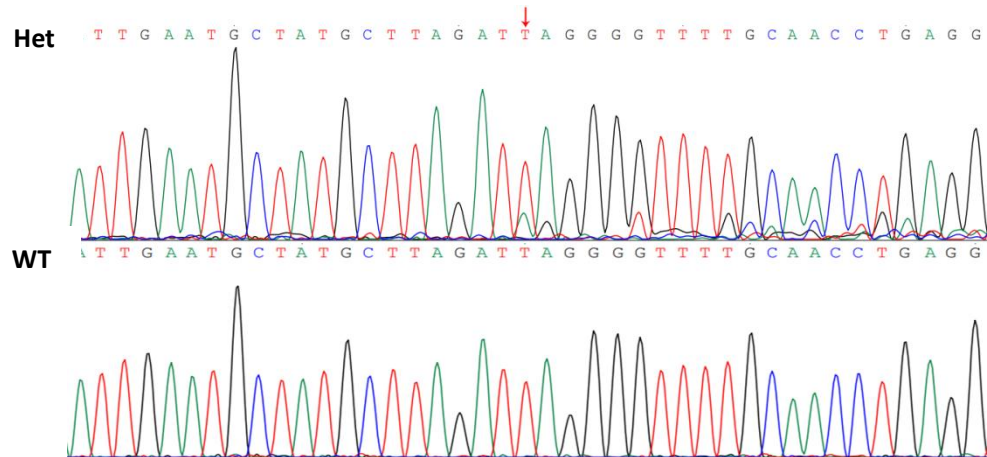

### Case.73

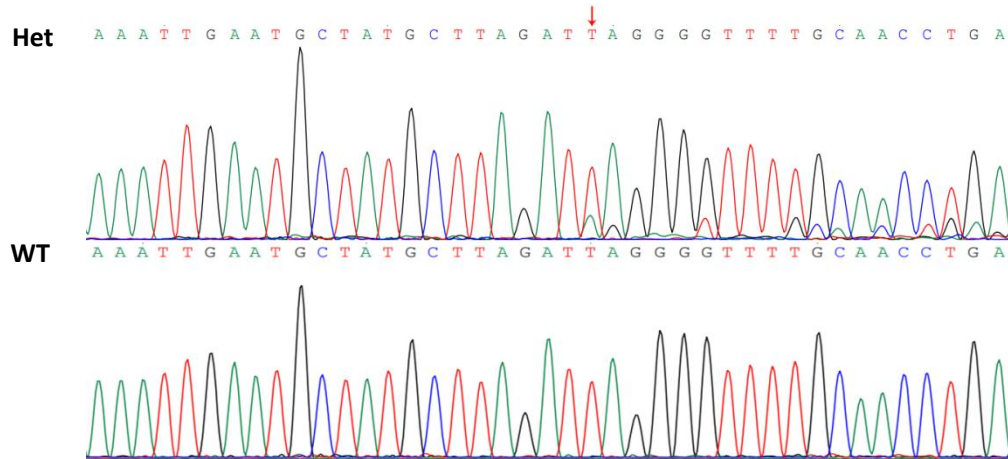

### Case.74

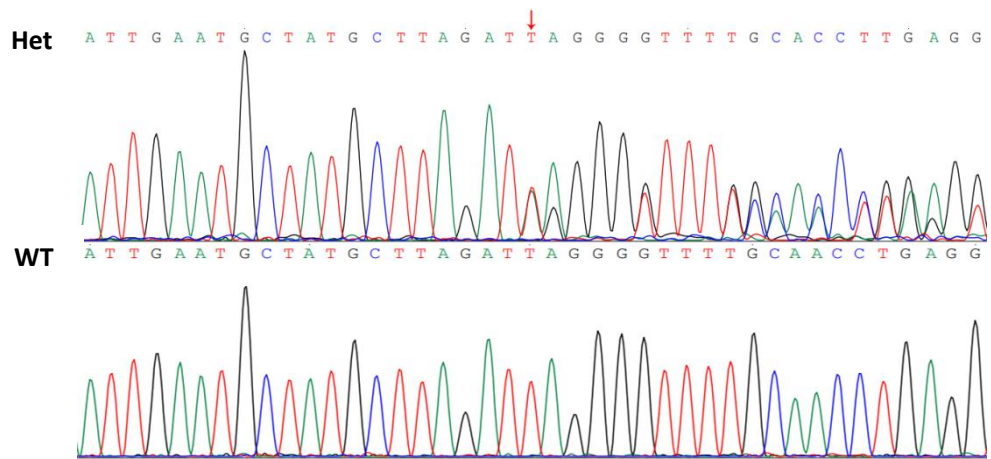

### *BRCA1* c.256T>C

### Case.7

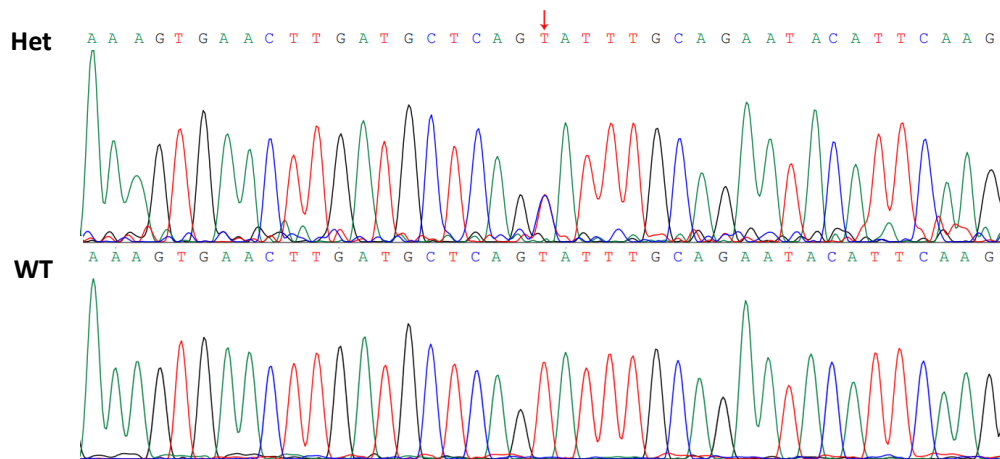



Case.29

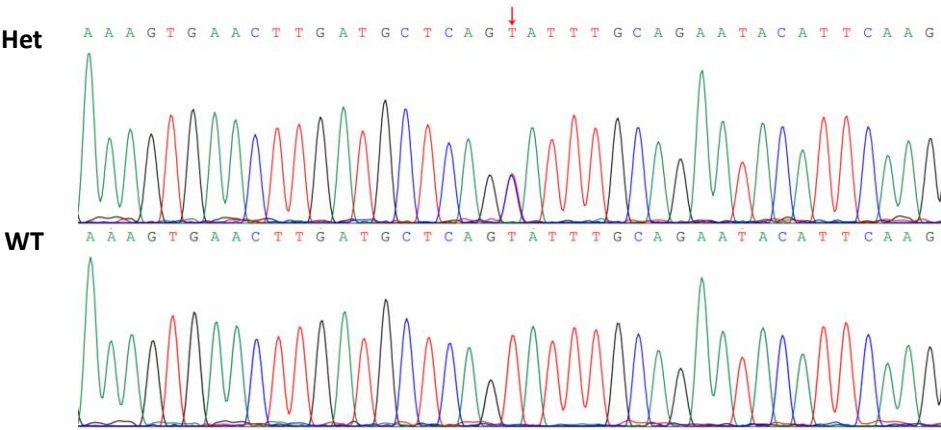

Case.63

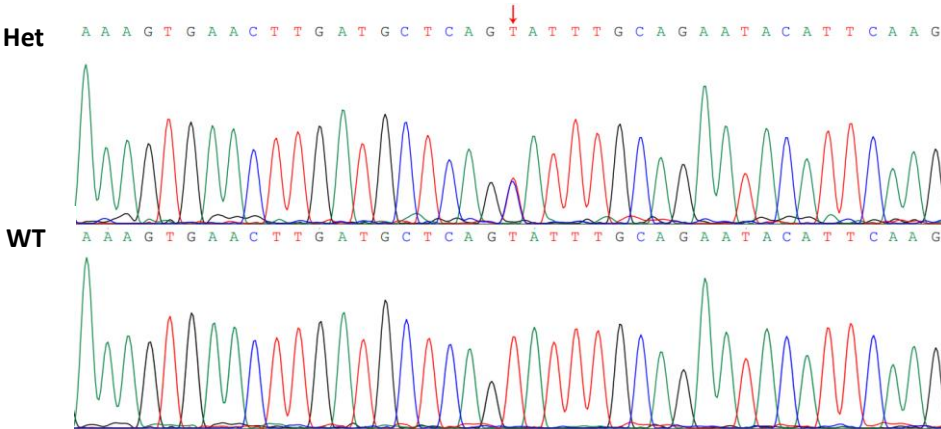

Case.66

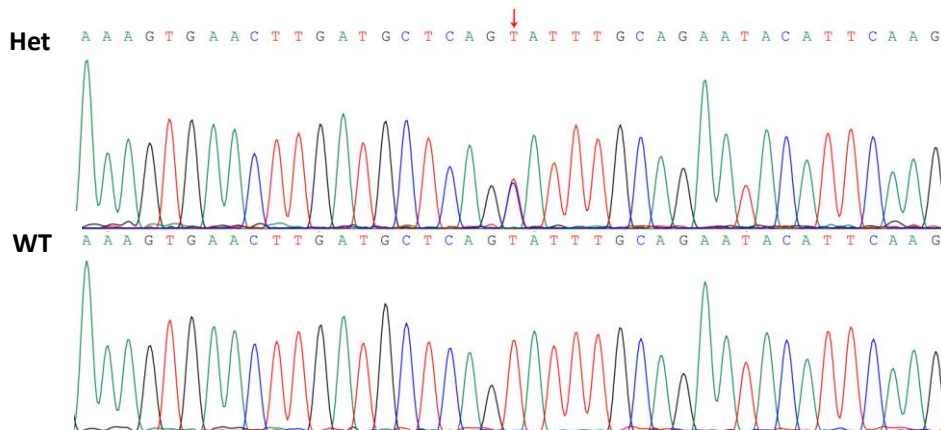

***BRCA1* c.1961delA**

**Case.67**

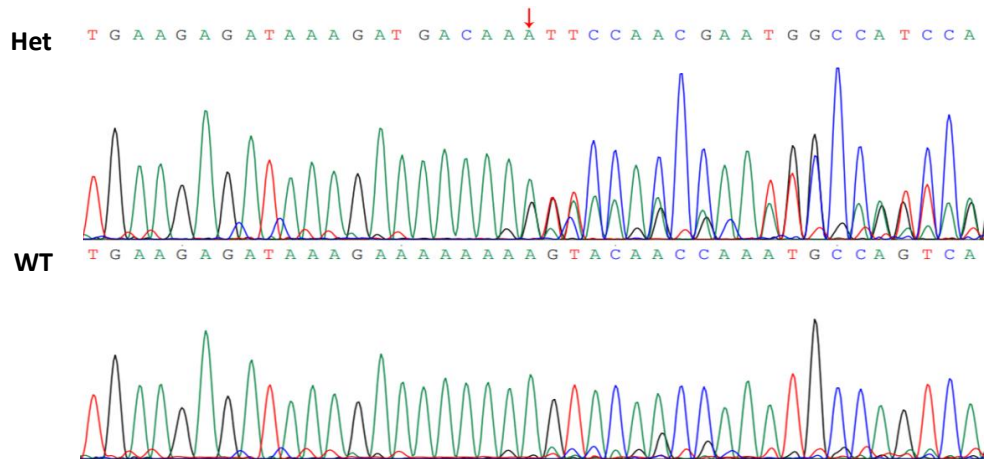

***BRCA1* c.1700\_1701insA**

**Case.40**

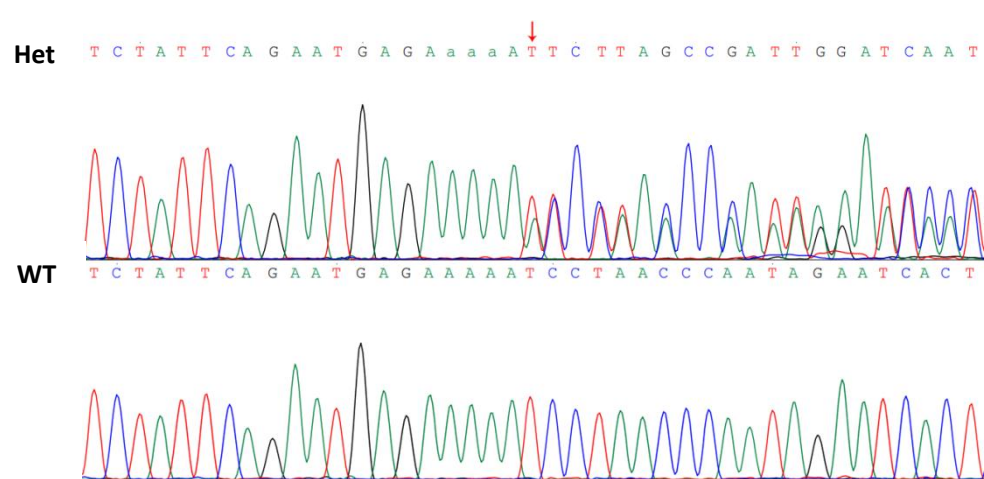

***BRCA1* c.440delT**

**Case.50**

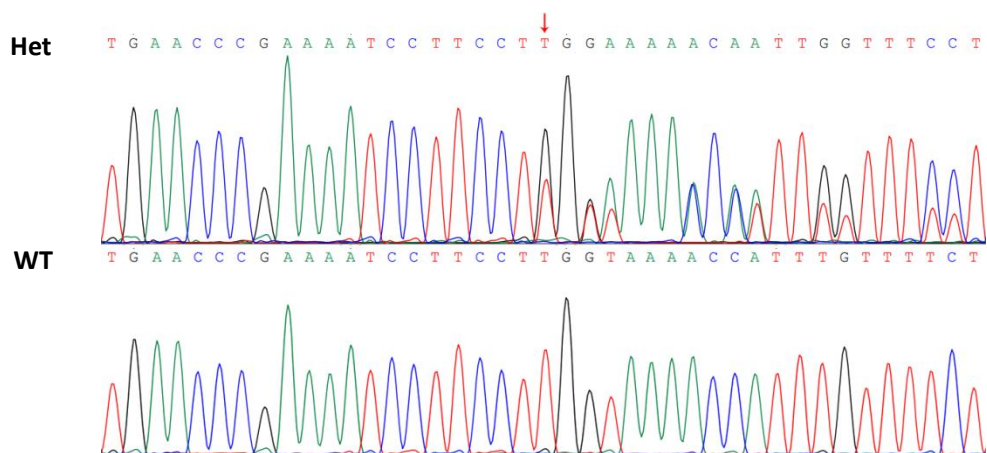

### Case.75

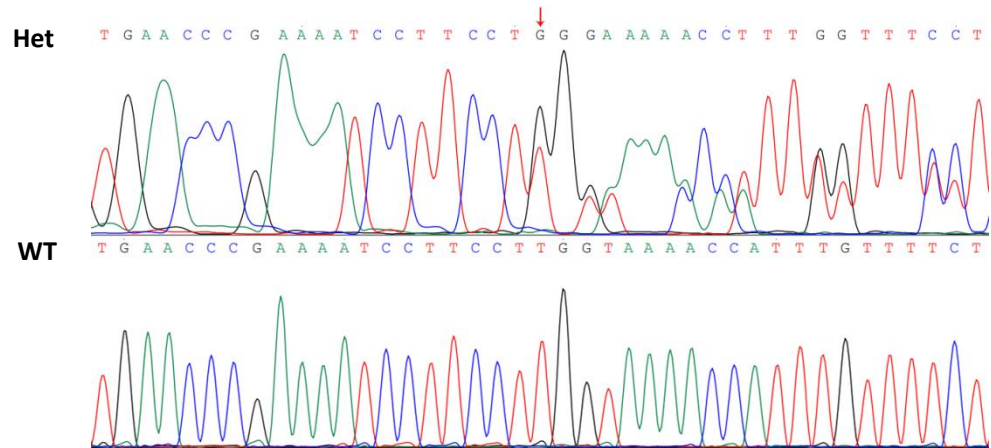

### BRCA1 c.824G>A

#### Case.4

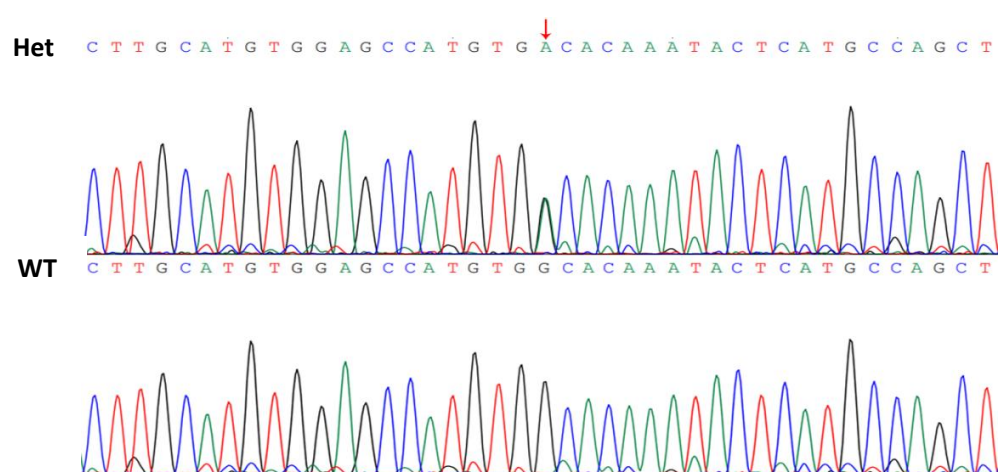

### Case.70

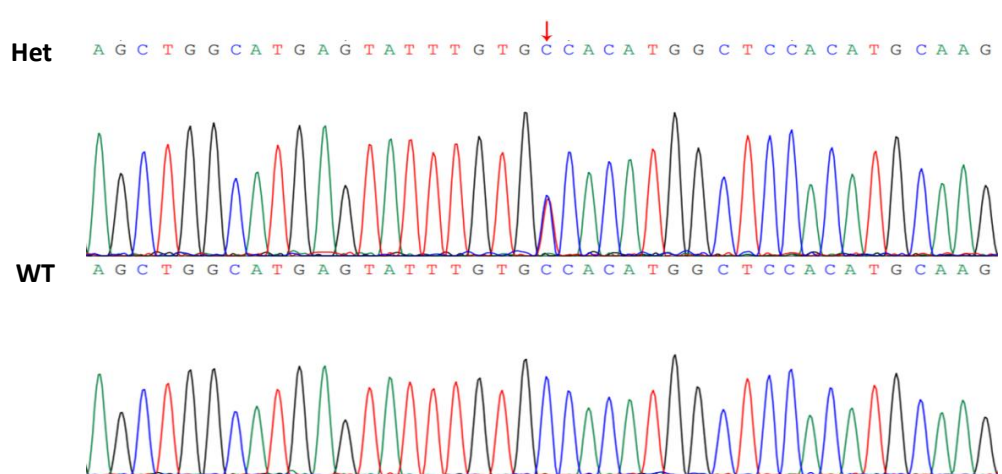



**BRCA2 c.353G>A**

**Case.37**

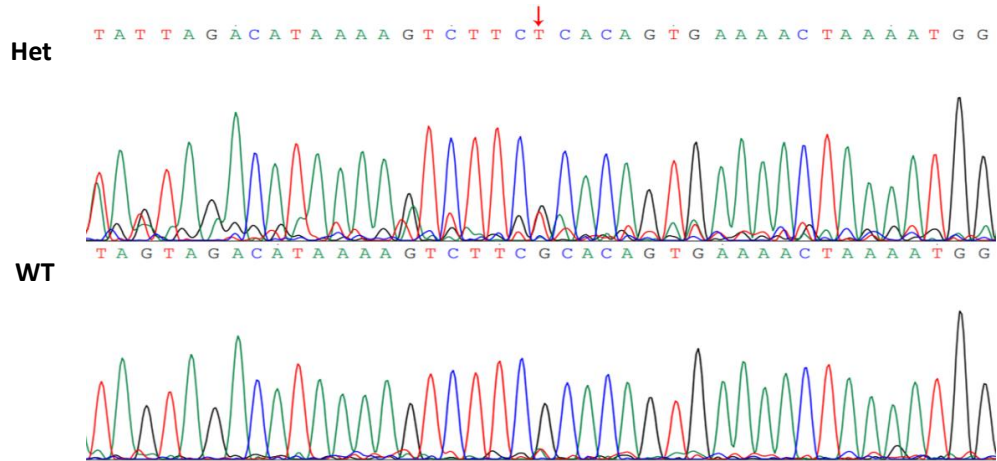

**BRCA2 c.1960G>A**

**Case.25**

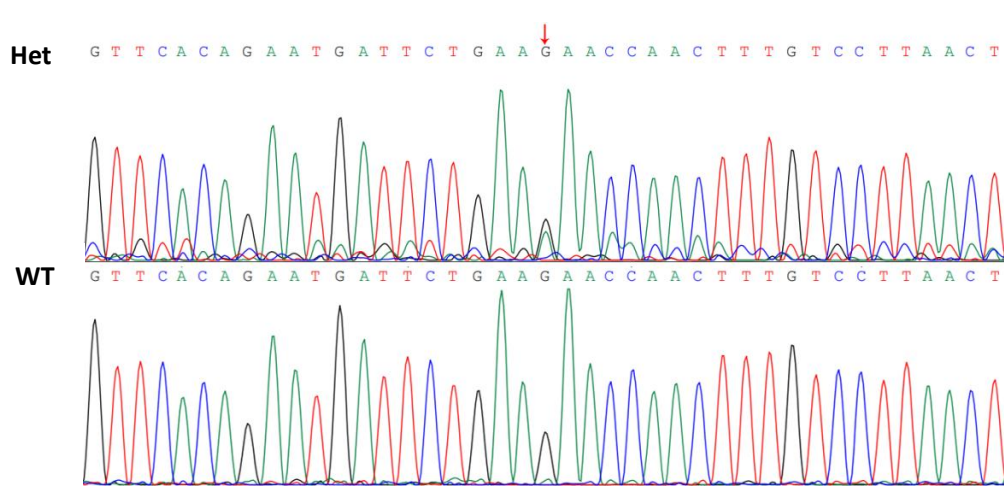

**BRCA2 c.2471T>G**

**Case.10**

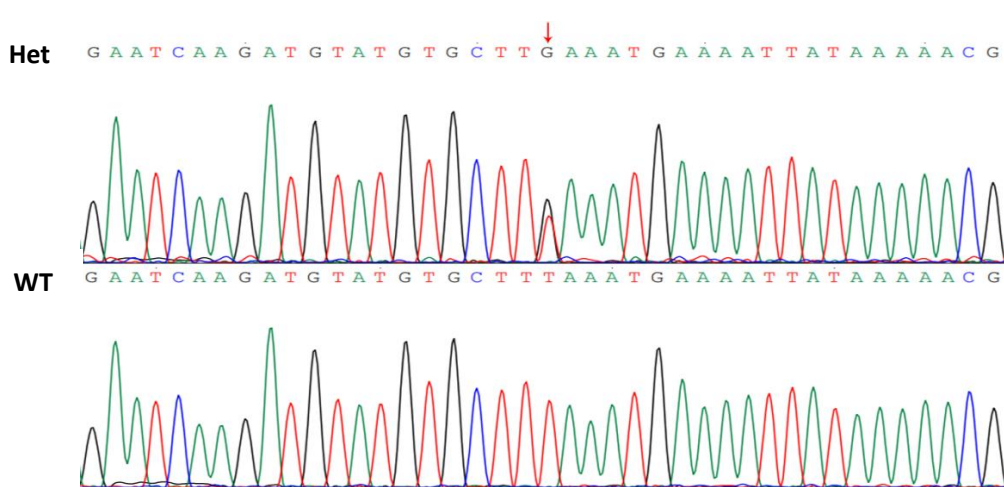



**BRCA2 c.3265C>T**

**Case.57**

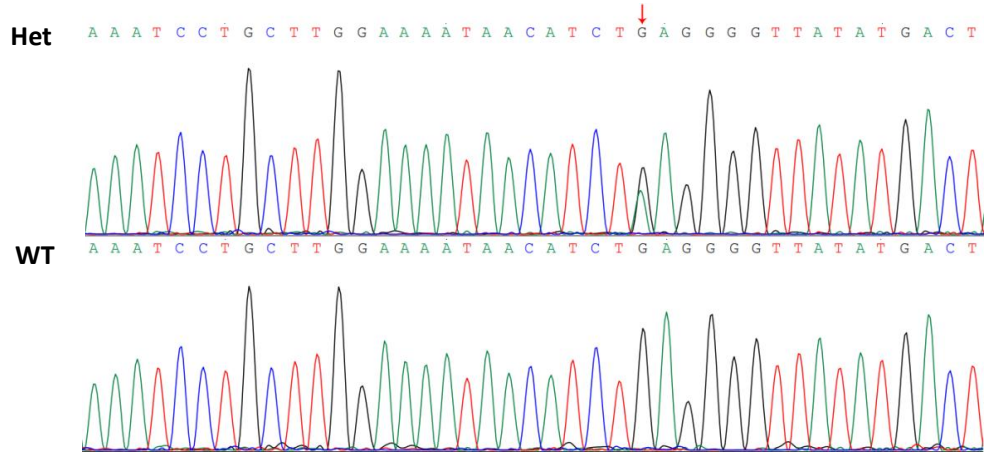

**BRCA2 c.4207A>G**

**Case.35**

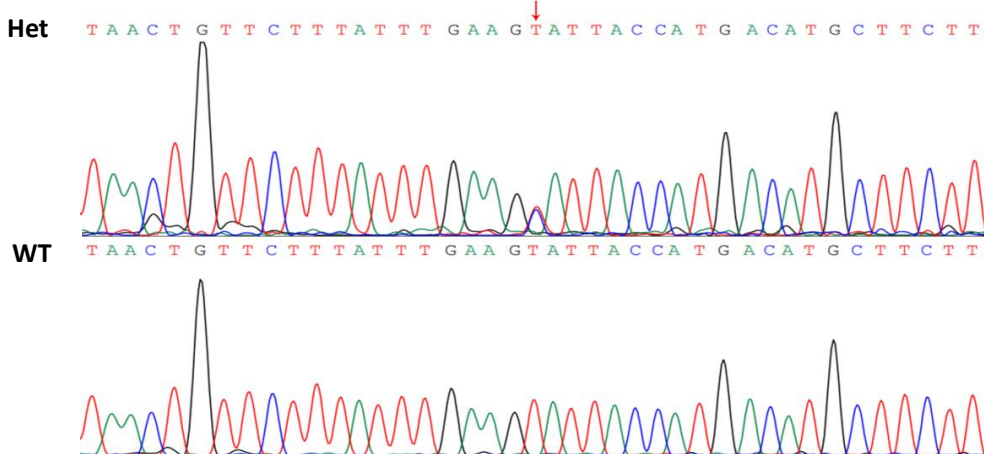

**BRCA2 c.4307T>C**

**Case.64**

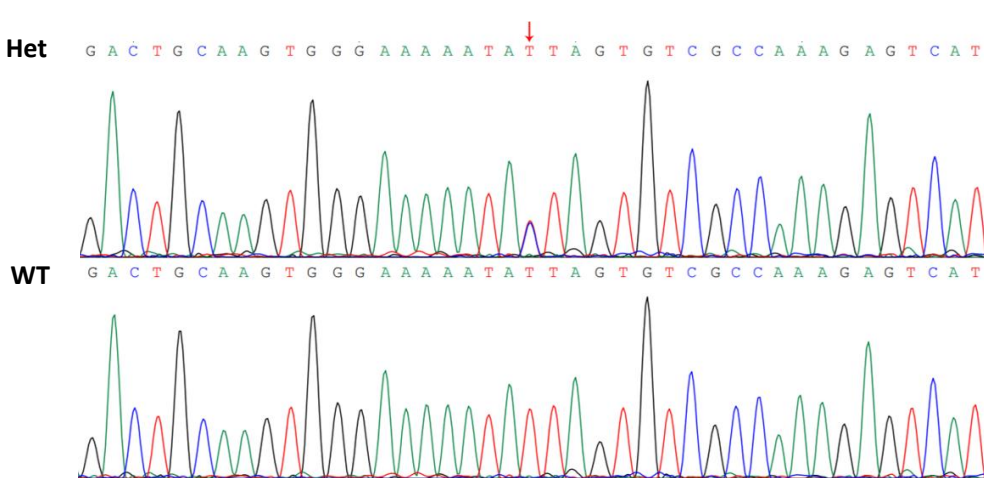

**Case.79**

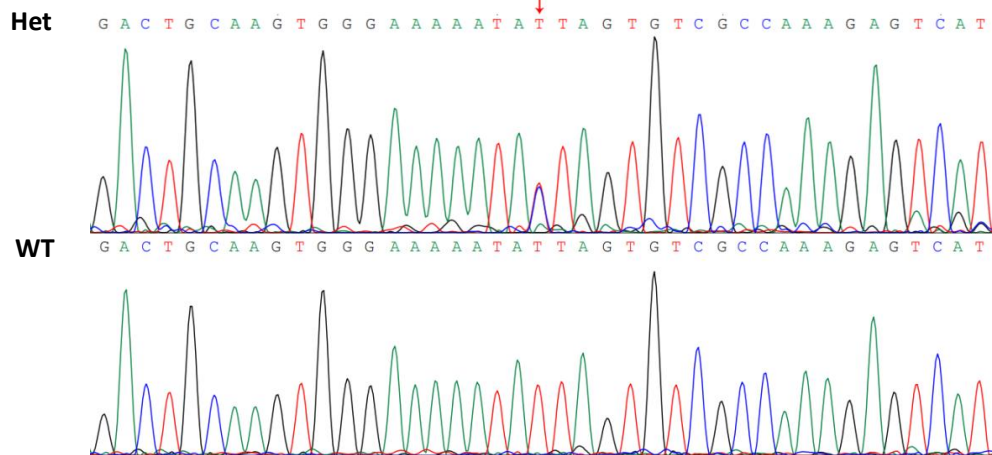

**BRCA2 c.5681dupA**

**Case.61**

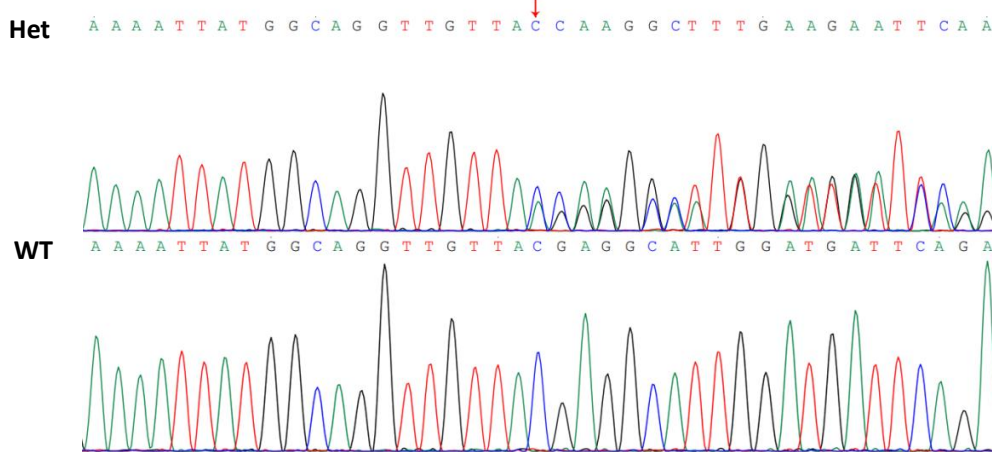

**BRCA2 c.7093C>A**

**Case.26**

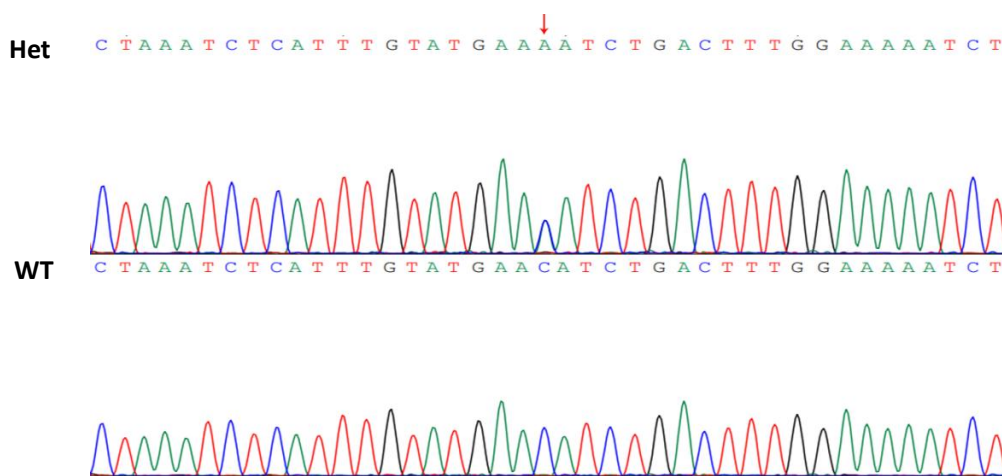

**BRCA2 c.7149T>A**

**Case.69**

**Het**

G T T T C A G G A C A T C C A T T T T A T C A A G T T T C T G C T A C A A G A A A

**WT**

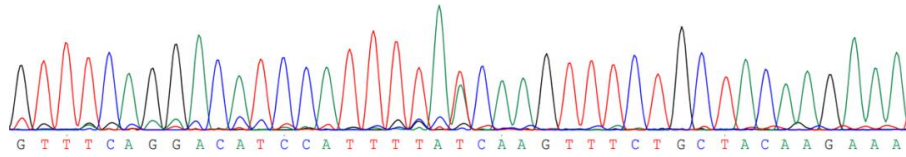

**BRCA2 c.7409dupT**

**Case.18**

**Het**

C A A G C A G C A G C T G T A A C T T T T C A C A A A T G G G A A A A A A C

**WT**

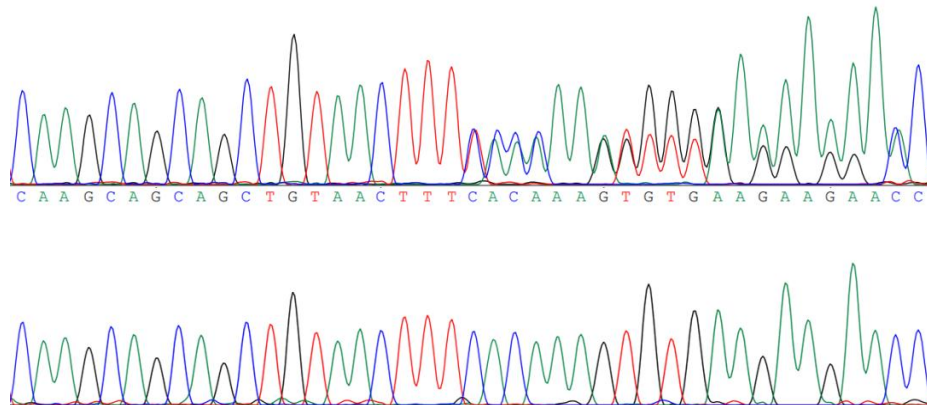

**Case.76**

**Het**

C T T C T T C A C A C T T T G T G A A A G T T A C A G C C A C C G C T T G G T T T

**WT**

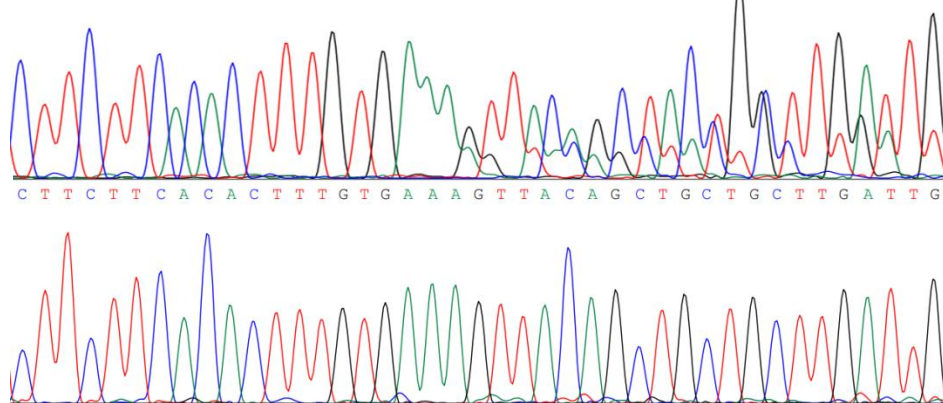

### Case.77

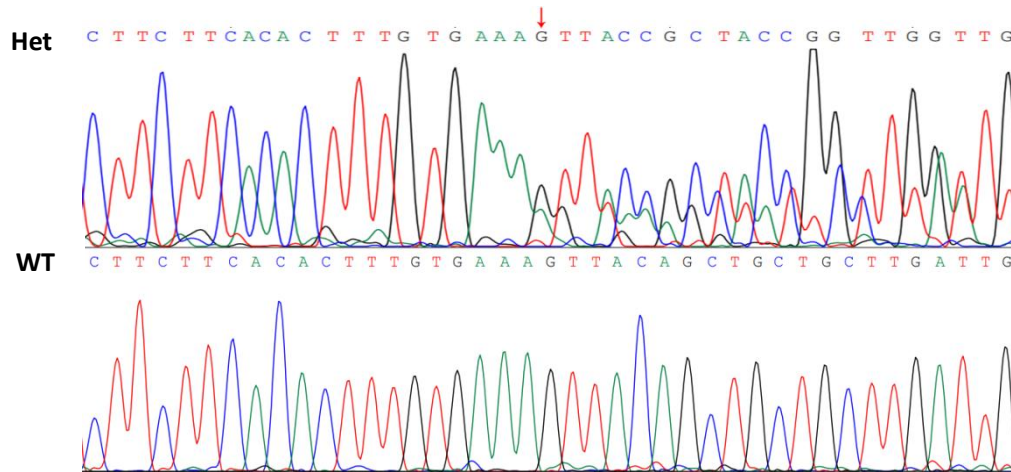

### Case.80

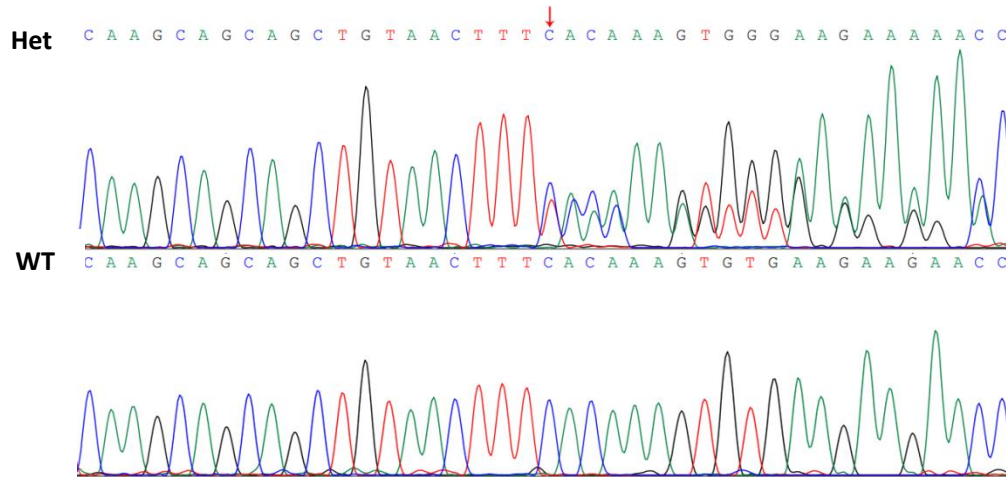

### BRCA2 c.7522G>A

### Case.3

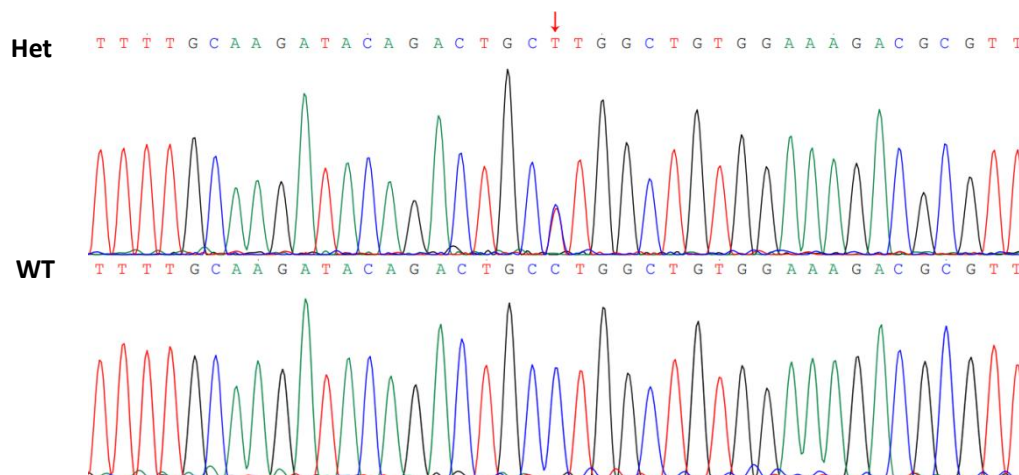



**BRCA2 c.8414G>T**

**Case.36**

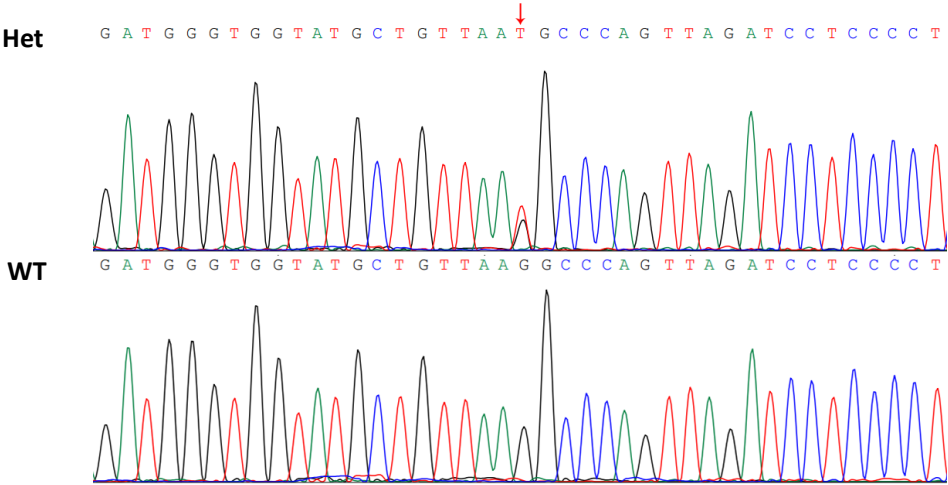

**Case.43**

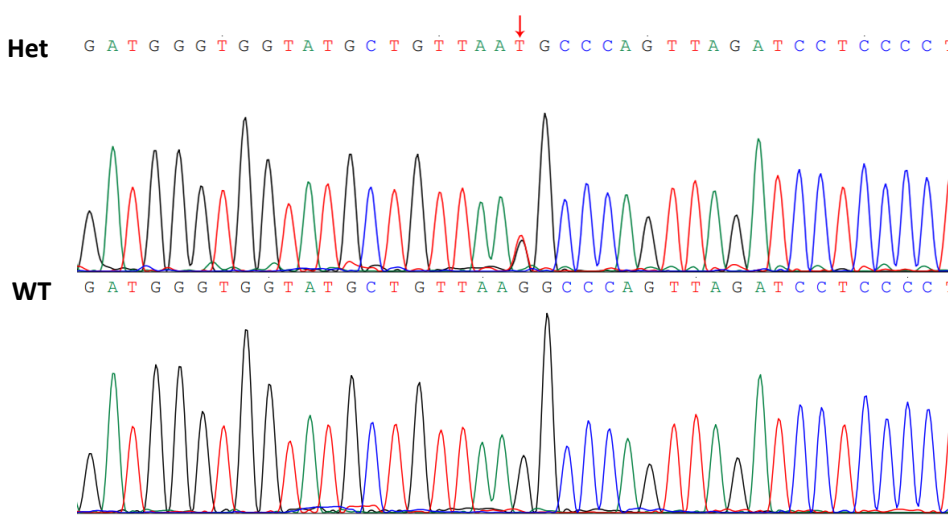

**Case.49**

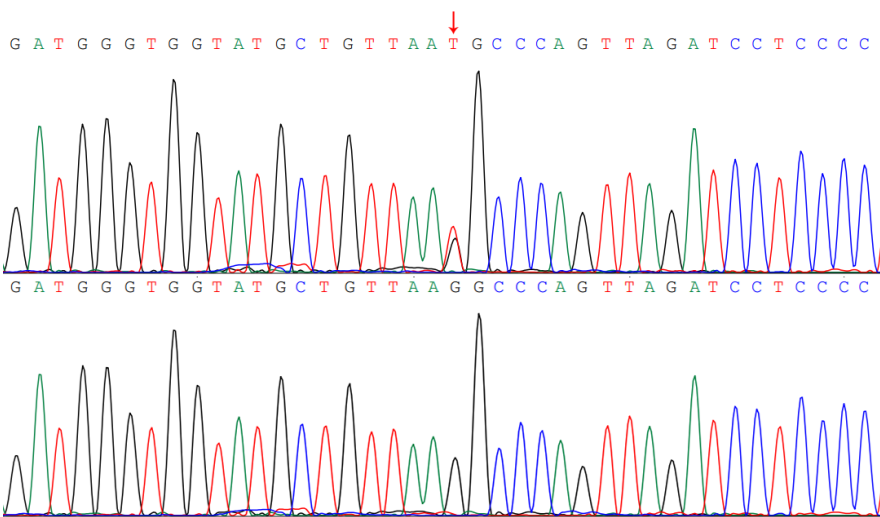



Supplementary Figure 2

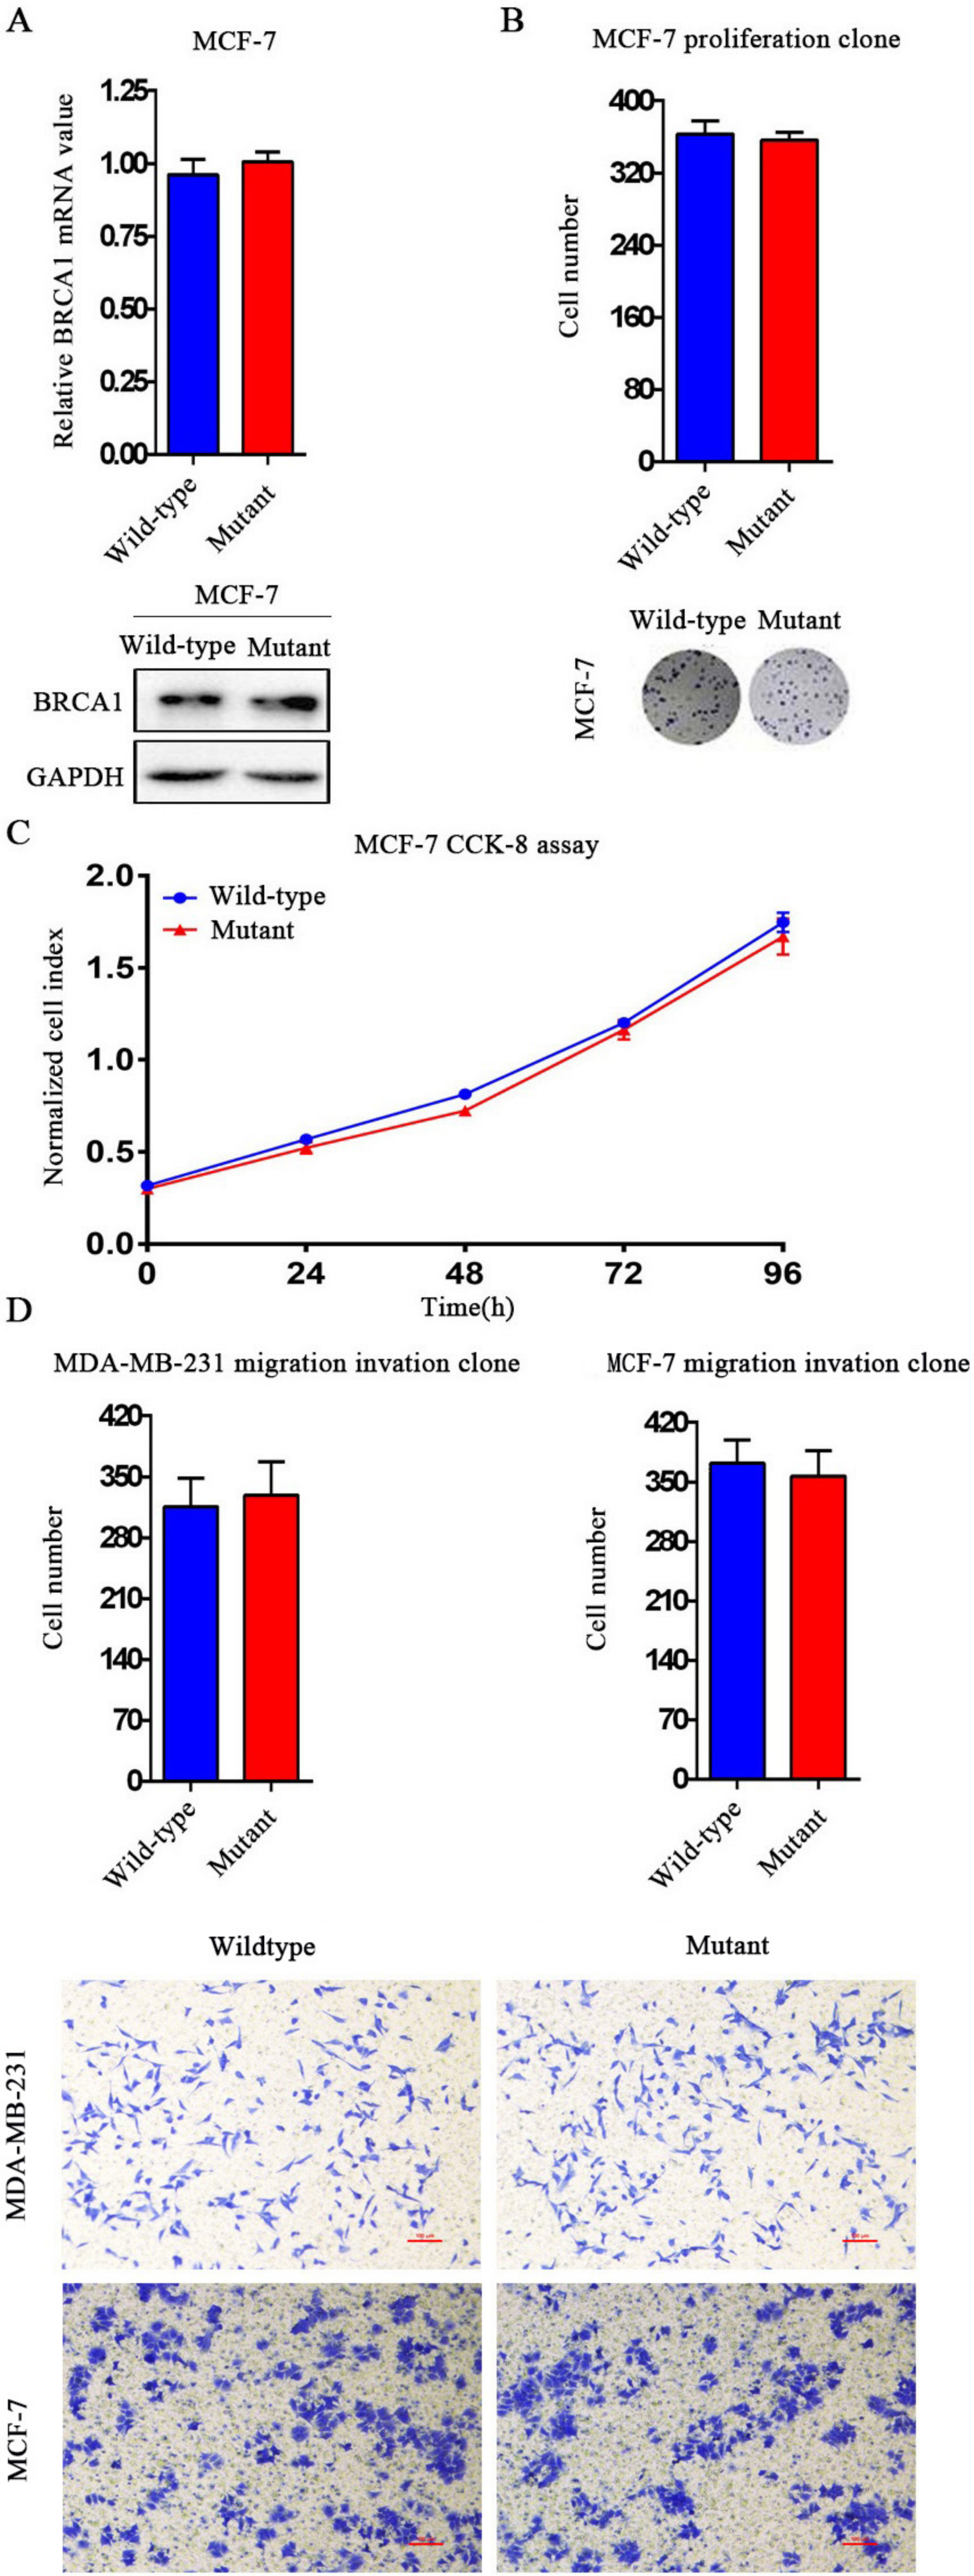



Supplementary Figure 3

A

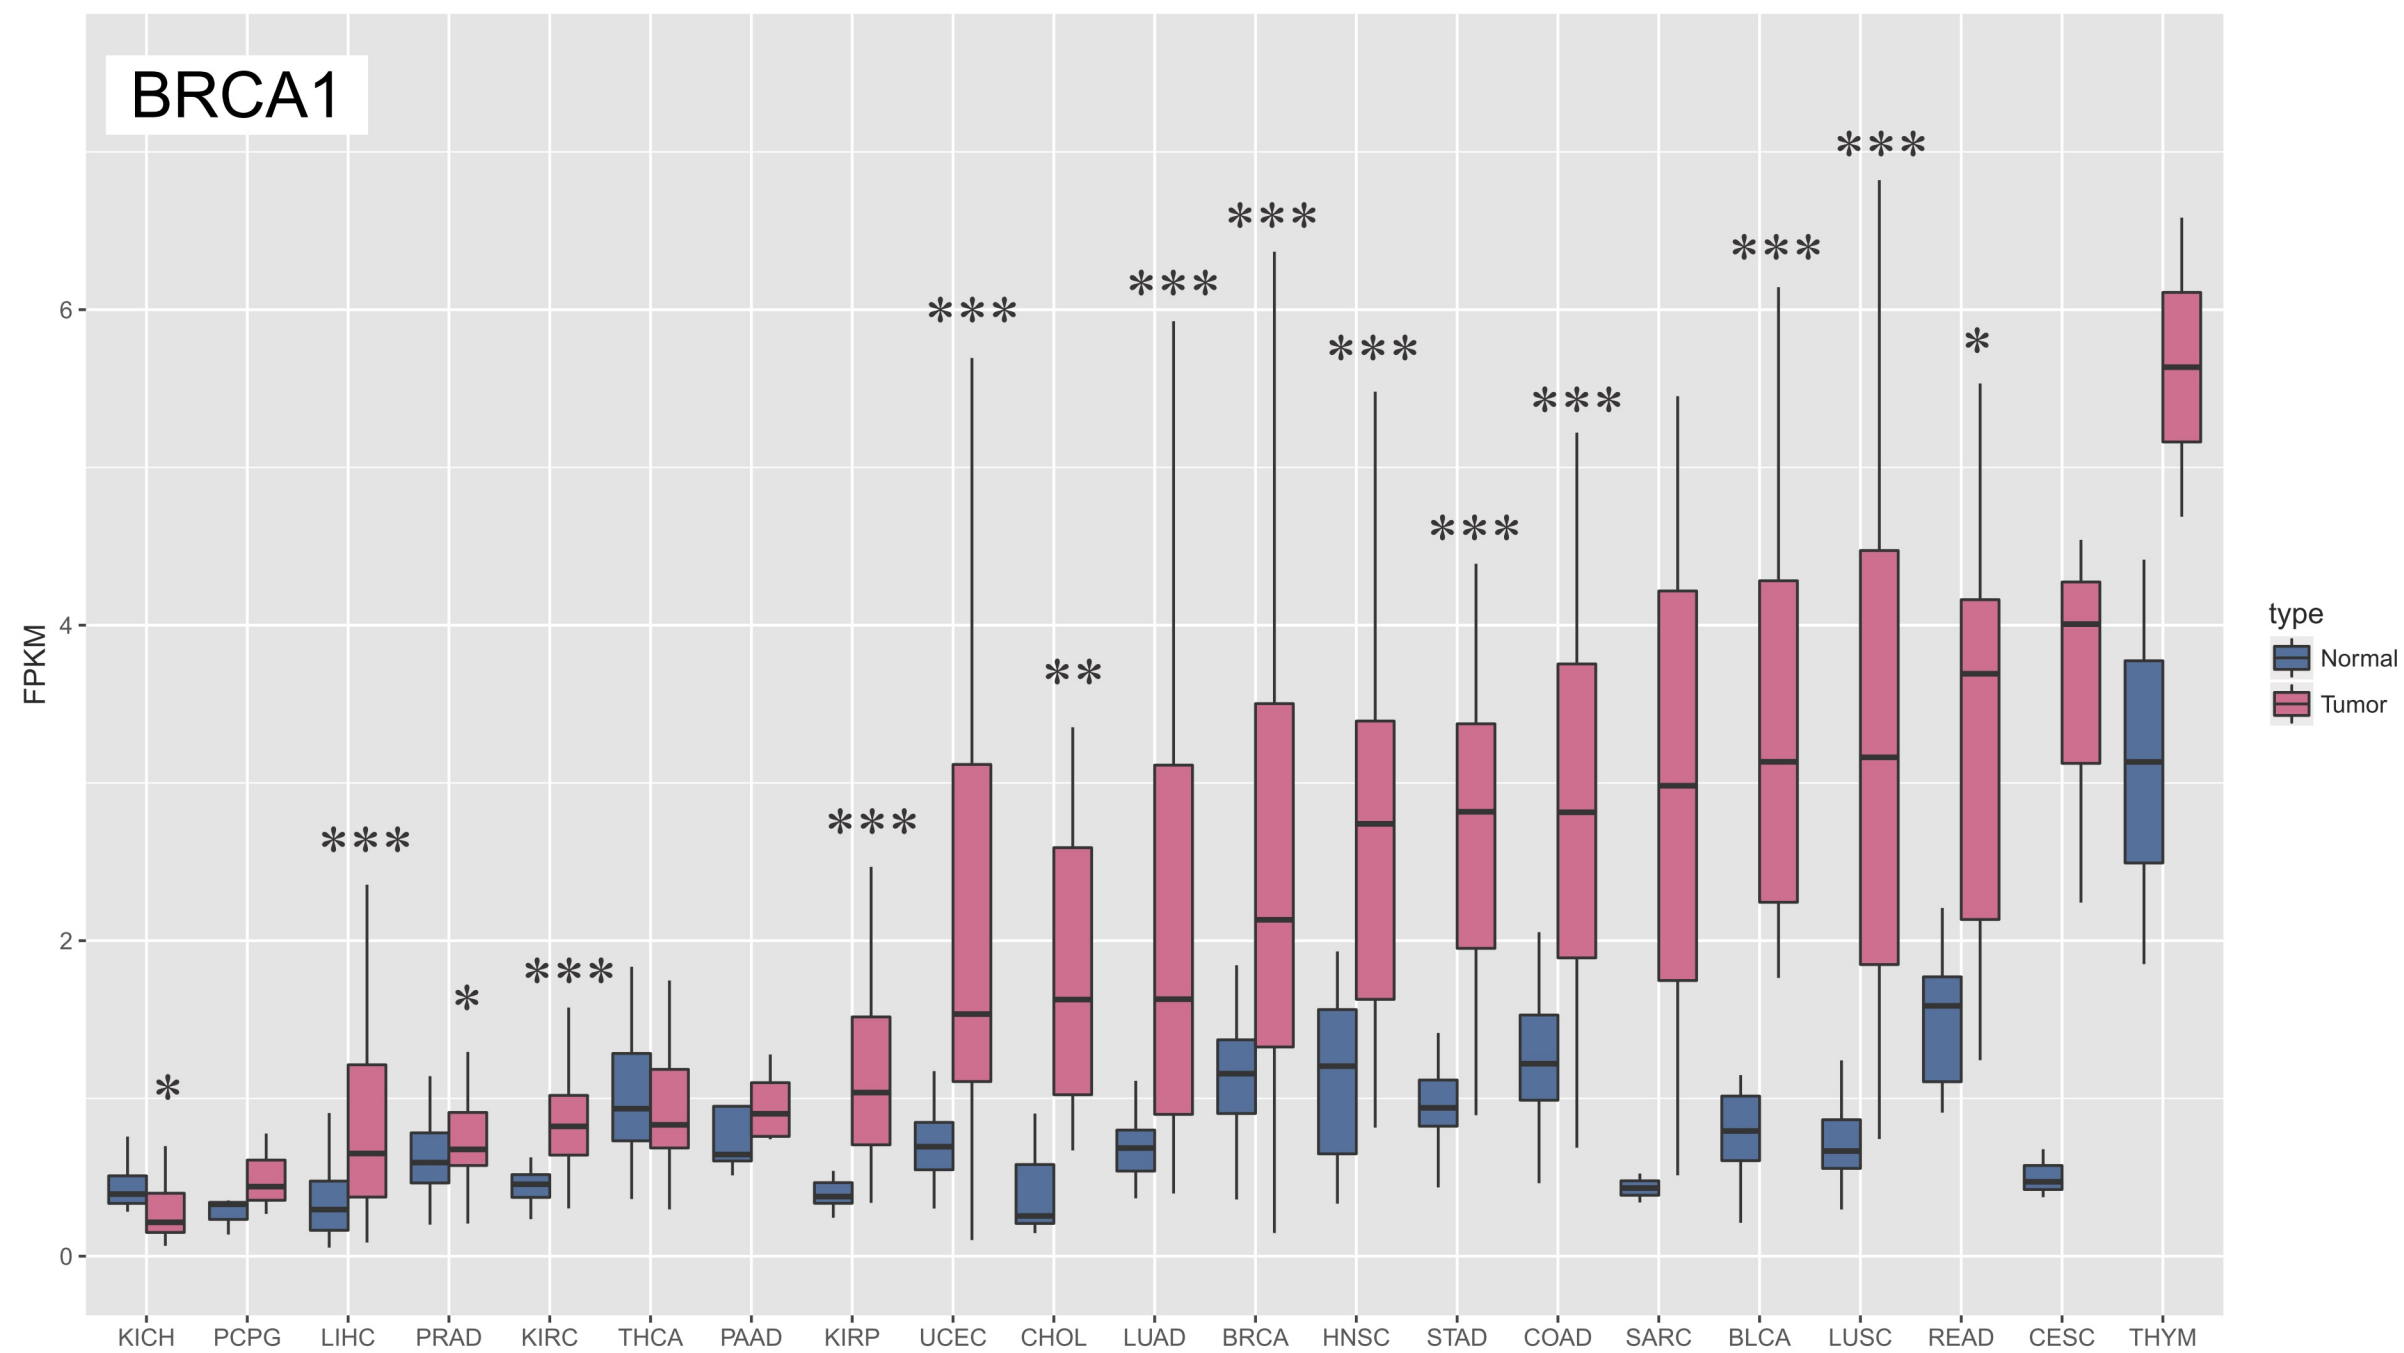

B

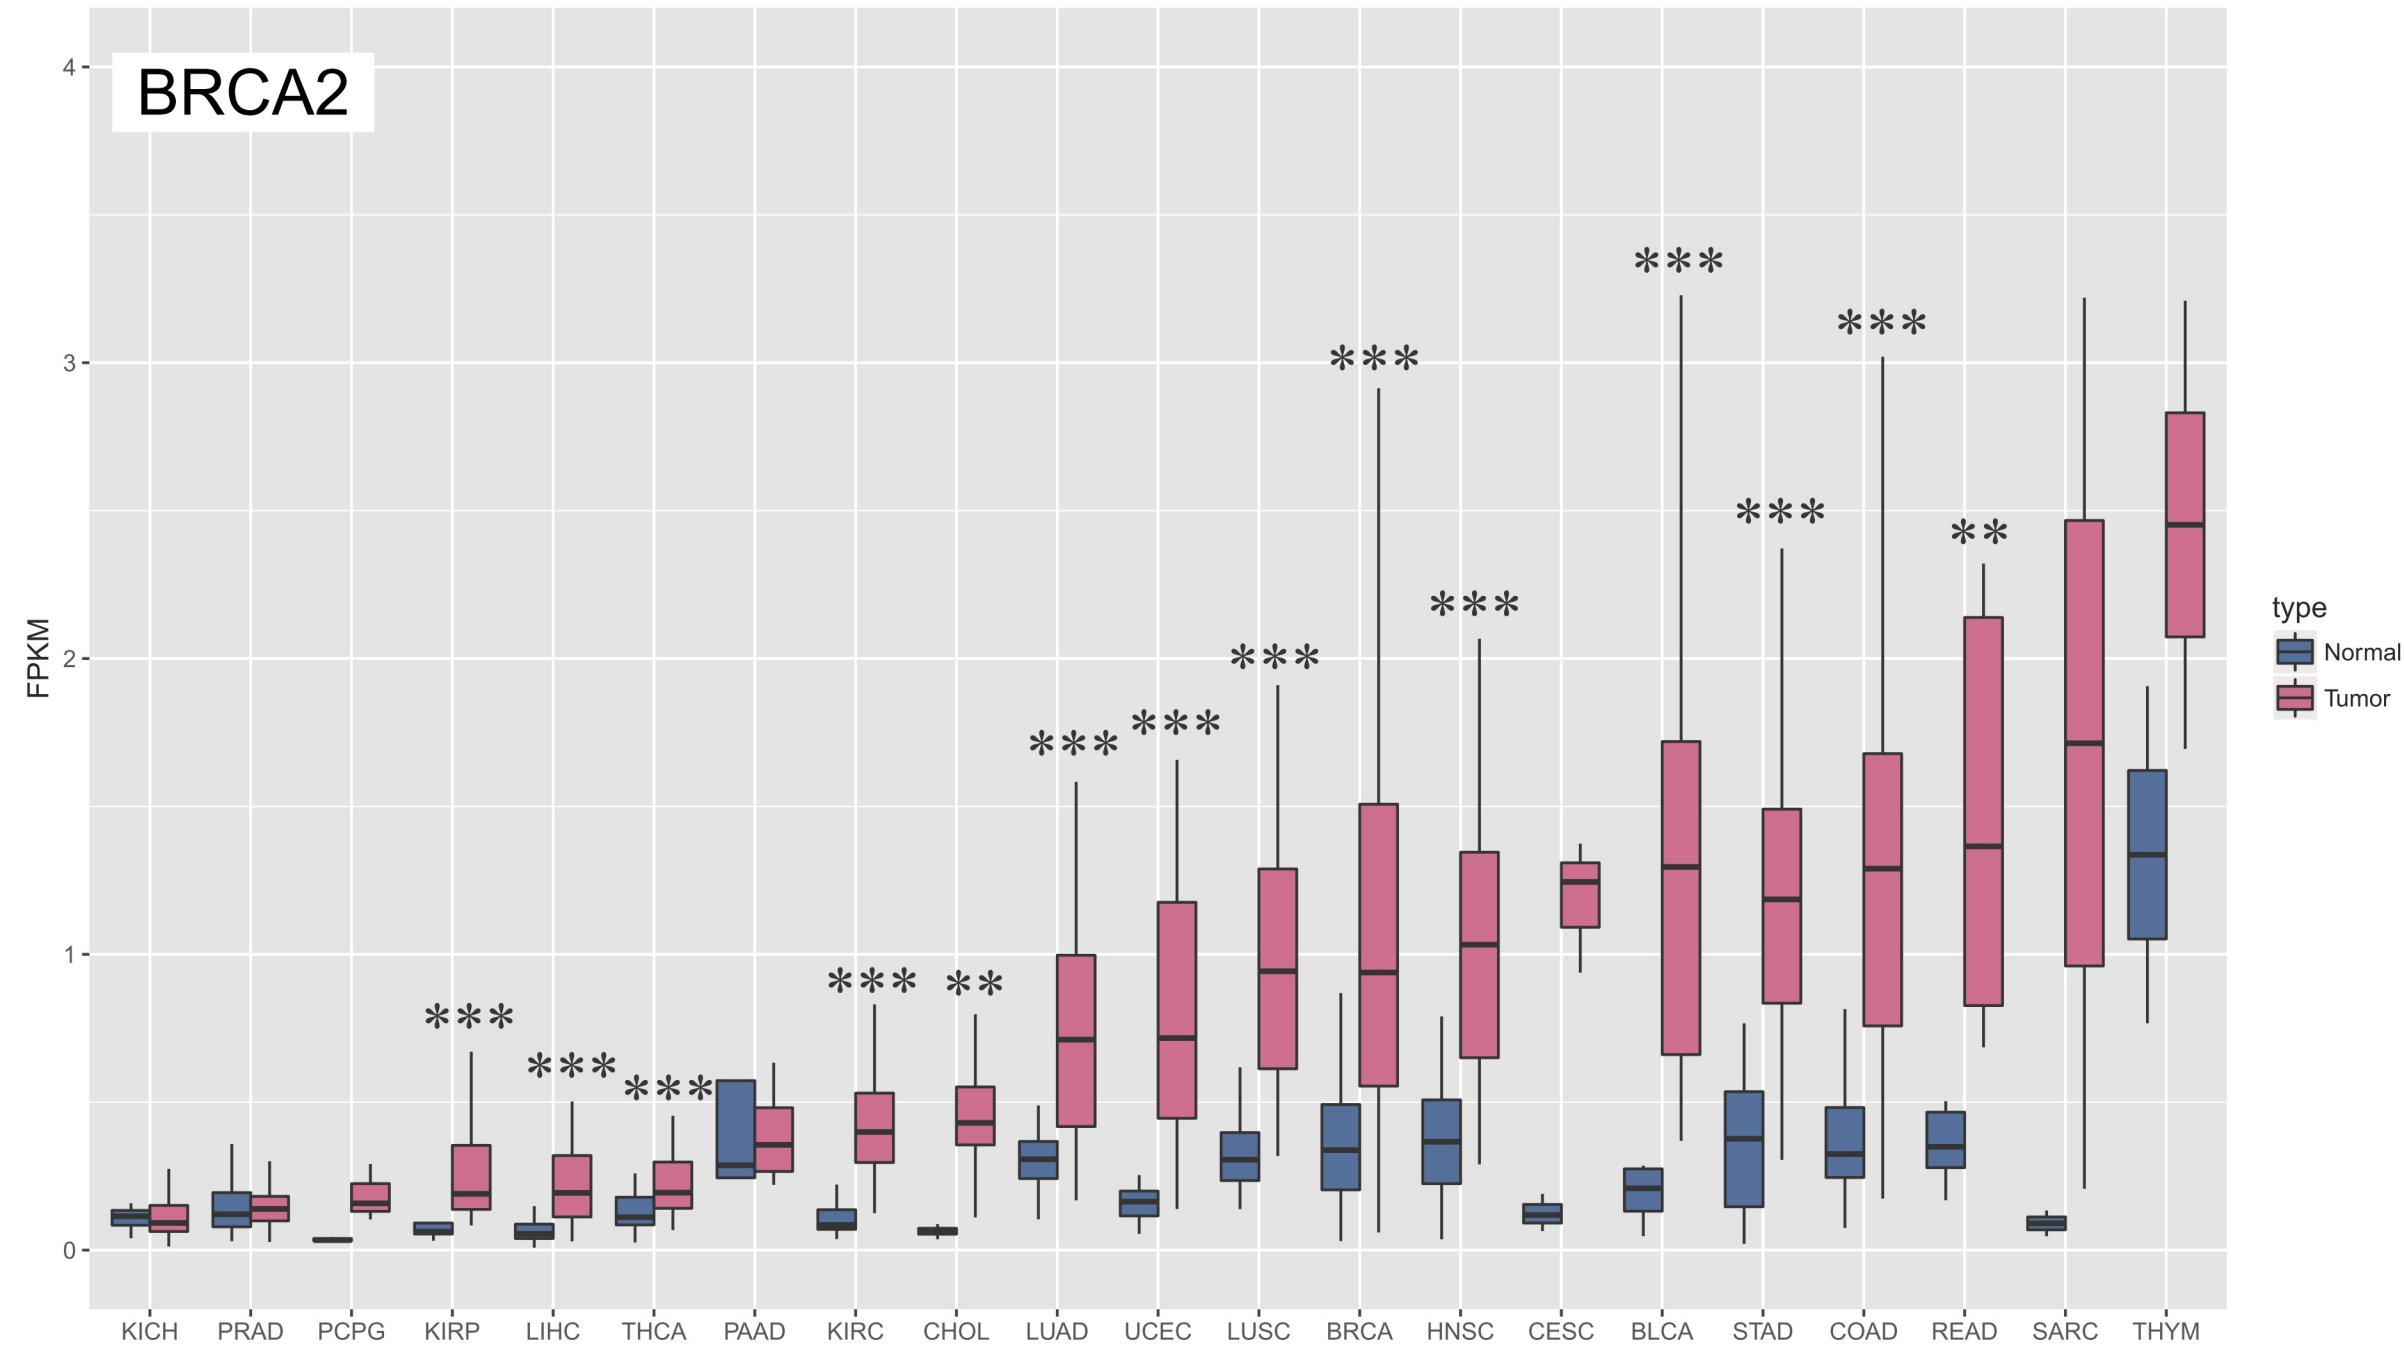

**Supplementary Table 1.** Information of primers for *BRCA1*.

**Supplementary Table 2.** Information of primers for *BRCA2*.

**Supplementary Table 3.** Distributions of selected variables in multi-cancer cases and cancer-free controls.

**Supplementary Table 4.** 48 variants obtained from *BRCA1/2* scanning in 70 familial breast cancer cases.

**Supplementary Table 5.** No recurrent *BRCA1/2* germline variants in validation stages.

**Supplementary Figure 1.** Sequence results of 20 detected variants in 31 cases in *BRCA1* and *BRCA2*.

**Supplementary Figure 2.** (A) The mRNA level of MCF-7 transfected with different plasmids showed no significant difference in different groups ( $P > 0.05$ ). Western blot analysis showed that the *BRCA1* proteins translated by *BRCA1* c.3257del were not truncated in MCF-7 cells. (B) The colony formation efficiency of MCF-7 transfected with *BRCA1* c.3257del was not increased ( $P > 0.05$ ). (C) *BRCA1* c.3257del-overexpressing MCF-7 cell proliferation efficiency was not increased as measured by the CCK-8 assay in vitro ( $P > 0.05$ ). (D) Both MDA-MB-231 and MCF-7 cell migration were measured by transwell assay, and no significant difference in cell migration was detected ( $P > 0.05$ ).

**Supplementary Figure 3.** *BRCA1* and *BRCA2* expression data from TCGA in multiple tumors compared with paired normal tissues.
